1        Early functional connectivity in the developing sensorimotor  
2                    network that is independent of sensory experience  
3

4                    Christine M. Cross<sup>1</sup>, Laura Mediavilla Santos<sup>1</sup>,  
5                    Nick Whiteley<sup>2</sup>, Karen Luyt<sup>3,4</sup>, Michael C. Ashby<sup>1+</sup>

6  
7    + corresponding author/lead contact, email: [m.c.ashby@bristol.ac.uk](mailto:m.c.ashby@bristol.ac.uk)

8    <sup>1</sup> School of Physiology, Pharmacology & Neuroscience, University of Bristol, Biomedical  
9    Sciences Building, University Walk, Bristol, BS8 1TD, United Kingdom.

10    <sup>2</sup> School of Mathematics, University of Bristol, Bristol, United Kingdom.

11    <sup>3</sup> Neonatal Neurology, Bristol Medical School, Faculty of Health Sciences, University of  
12    Bristol, Bristol, United Kingdom.

13    <sup>4</sup> Neonatal Intensive Care Unit, St Michael's Hospital, University Hospitals Bristol NHS  
14    Foundation Trust, Bristol, United Kingdom.

15

## 16 Summary

17 Neonatal sensory experience shapes development of neural pathways carrying sensory  
18 information to the cortex. These pathways link to wider functional networks that  
19 coordinate activity of separate cortical regions, but it remains unknown when these  
20 broader networks emerge or how their maturation is influenced by sensory experience.  
21 By imaging activity across the cortex in neonatal mice, we have found unexpectedly  
22 early emergence of coordinated activity within a sensorimotor network that includes  
23 whisker-related somatosensory cortex and motor cortex. This network is spontaneously  
24 active but is not engaged by sensory stimulation, even though whisker deflection reliably  
25 drives cortical activity within barrel cortex. Acute silencing of the sensory periphery  
26 ablated spontaneous activity that was restricted to barrel cortex but spared this early  
27 sensorimotor network coactivity, suggesting that it is driven from elsewhere.  
28 Furthermore, perturbing sensory experience by whisker trimming did not impact  
29 emergence or early maturation of spontaneous activity in the sensorimotor network. As  
30 such, functional sensorimotor cortical networks develop early and, in contrast to  
31 development of ascending sensory pathways, their initial maturation is independent of  
32 sensory experience.

## 33 Introduction

34 Neuronal activity within the developing brain is vital for the correct formation of  
35 mature functional neural networks. This activity can be evoked by both external sensory  
36 experience and generated spontaneously (Blankenship and Feller, 2010; Katz and Shatz,  
37 1996). Disruption of early neuronal activity patterns often results in the malformation  
38 of circuit connections within and between cortical regions (Ackman et al., 2012; Keller  
39 and Carlson, 1999; Kirkby et al., 2013; Leighton and Lohmann, 2016), which can then  
40 impact maturation of behaviour (Buzsáki, 2010; Harris, 2005; Musall et al., 2019).

41 Development of functional neuronal networks is a multistage process, beginning with  
42 activity independent molecular and genetic guidance, followed by activity dependent  
43 processes that can be divided into intrinsically (spontaneous) and extrinsically (evoked)  
44 generated events (Blankenship and Feller, 2010; Leighton and Lohmann, 2016;  
45 Yamamoto and López-Bendito, 2012). Even early spontaneous activity can be highly  
46 organised both spatially and temporally, often propagating through nascent neural  
47 connections. Spontaneous activity generated in the periphery is well documented in early  
48 stages of sensory network development (Ackman et al., 2012; Babola et al., 2018;  
49 Hanganu et al., 2006; Mizuno et al., 2018). For example, spontaneous retinal waves drive  
50 activity that propagates all the way to visual cortex and spontaneous twitching of  
51 individual whiskers leads to somatotopic activation of somatosensory cortex in neonatal  
52 rodents (Ackman et al., 2012; Arroyo and Feller, 2016; Tiriac et al., 2012). These forms  
53 of spontaneous peripheral activation of sensory receptors guide initial arrangement of  
54 connectivity in preparation for active sensing and the experience-dependent plasticity  
55 that it drives. Other sources of spontaneous activity also exist within developing sensory  
56 pathways. Spontaneous embryonic thalamic activity that appears before connection to  
57 upstream sensory relays shapes patterning of sensory cortical areas (Antón-Bolaños et  
58 al., 2019). There are also reports of spontaneous cortical activity that is seemingly  
59 independent of the sensory periphery (Siegel et al., 2012; Yang et al., 2009).

60 The maturation of the circuitry that underpins sensory perception is thought to  
61 proceed in a temporal sequence, which follows the order of the synaptic relays that carry  
62 the activity from the sensory periphery up to the cortex. As such, more peripheral  
63 synapses mature first and are followed, in sequence, by the downstream connections.  
64 Indeed, it has been shown that the later development of downstream synaptic  
65 connections can depend on the correct, earlier maturation of afferent parts of the  
66 pathway. For example, in the sensory pathway carrying whisker information to the  
67 primary somatosensory cortex, the brainstem to thalamus synapse matures before the

68 thalamocortical projection into layer 4 of barrel cortex. Recurrent connections within  
69 layer 4 then mature in a short window before the maturation of synapses from layer 4  
70 onto layer 2/3 neurons and then layer 2/3 to layer 5, mirroring the sequence of flow of  
71 whisker information flow through the mature circuit (Anastasiades and Butt, 2012;  
72 Ashby and Isaac, 2011; van der Bourg et al., 2016; Yang et al., 2018). Ultimately, the  
73 full maturation of the synaptic pathway depends on plasticity driven by activity from  
74 whisker experience at the appropriate time (Erzurumlu and Gaspar, 2012; Fox, 1992).

75 As with other pathways bringing sensory information from the periphery, whisker-  
76 related information integrates into a larger cortical network downstream of the primary  
77 sensory area. This connectivity between brain regions underpins the broader functional  
78 networks that have been associated with sensory stimulation. In the mature rodent brain,  
79 a robust sensorimotor network is characterised by strong functional connectivity between  
80 primary somatosensory (S1) and motor (M1) cortex (Aronoff et al., 2010; Chakrabarti  
81 and Alloway, 2006; Mao et al., 2011). The integration of information between these  
82 regions is vital for sensory perception and motor behaviours (Petersen, 2019). In the  
83 mature brain, there is specific functional coactivity of S1 and M1 that occurs both  
84 spontaneously (Afrashteh et al., 2020; Mohajerani et al., 2013) and in response to  
85 external somatosensory stimuli (Chakrabarti et al., 2008; Ferezou et al., 2007; Manita  
86 et al., 2015). However, because of the difficulty of simultaneously recording from multiple  
87 regions in the neonatal rodent brain, relatively little is known about when large cortical  
88 networks start to be engaged by sensory stimuli or how they mature during neonatal  
89 development.

90 To address these questions, we have used mesoscale calcium imaging to investigate  
91 the development of spontaneous and sensory evoked activity across the cortex of  
92 neonatal mice. Since these broader cortical networks are driven by sensory experience in  
93 the adult brain, we initially hypothesised that their developmental emergence would  
94 come after, and would depend on, the maturation of ascending pathways that carry  
95 relevant sensory-related activity. However, amongst the large changes in activity  
96 patterns that occur through this neonatal period, we found unexpectedly precocious  
97 development of a sensorimotor functional network between sensory and motor cortex.  
98 This network seems to initially be independent of the classical somatosensory pathway  
99 suggesting that its maturation follows an unexpected trajectory.

100

## 101 Results

### 102 Mesoscale imaging of cortical activity in neonatal mouse pups

103 To measure the dynamics of neural activity across the neocortex during early  
104 postnatal development, we established widefield mesoscale calcium imaging in head-  
105 fixed, behaving neonatal transgenic mouse pups expressing GCaMP6. A transgenic  
106 strategy was implemented to express the calcium indicator using a cross of *Emx1-IRES-*  
107 *cre*, which is expressed early in prenatal development, and *Ai95D* mice, which carry a  
108 *cre*-dependent *GCaMP6f* gene (Chan et al., 2001; Chen et al., 2013; Kummer et al.,  
109 2012). We adopted a breeding strategy using only singly transgenic males that produced  
110 pups with *GCaMP6* expression restricted predominantly in excitatory neocortical cells  
111 (see Methods, Supplementary Figure 1a). To capture the early stages of neocortical  
112 functional circuit development, we recorded sensory-evoked and spontaneous activity in  
113 pups aged between postnatal day 1 to 9 (P1-P9).

114 Prior to recording cortical activity, the scalp was removed, and a miniature head-  
115 fixation post attached to the skull over the cerebellum under brief (<10 minutes, 1.5-  
116 2.5% isoflurane) surgical anaesthesia. The skull was left intact. To avoid any lingering  
117 effects of anaesthesia (see Methods, Supplementary Figure 1b-c), analysis of cortical  
118 activity was based on data collected at least 60 minutes after removal of anaesthesia.  
119 For imaging, pups were head-fixed under a tandem lens fluorescence microscope in a  
120 warmed, nest-like environment (Ratzlaff and Grinvald, 1991). *GCaMP6f* fluorescence  
121 timelapse images of the entire cortical surface were collected at 50 frames per second  
122 (Figure 1a). Although the contribution of hemodynamic autofluorescence is small in  
123 neonatal mice (Kozberg et al., 2016), we did reliably observe a continual, high frequency  
124 (8-10Hz), low amplitude oscillation in fluorescence (Supplementary Figure 1e). This  
125 signal, which is consistent with heart rate of neonatal mice, was removed from  
126 fluorescence traces using a low-pass 7Hz filter that did not impact detection of lower  
127 frequency activity (Supplementary Figure 1d).

### 128 Spontaneous neonatal cortical activity

129 Even during periods of behaviourally quiet rest, neuronal networks are still active in  
130 both the adult (van den Heuvel and Hulshoff Pol, 2010; Mohajerani et al., 2013; Vanni  
131 and Murphy, 2014) and neonatal brain (Ackman et al., 2014; Colonnese and Khazipov,  
132 2012; Doria et al., 2010). Indeed, we observed regionally-localised, ongoing patterns of  
133 fluorescence changes across all of the cortical field of view in resting neonatal mice. This

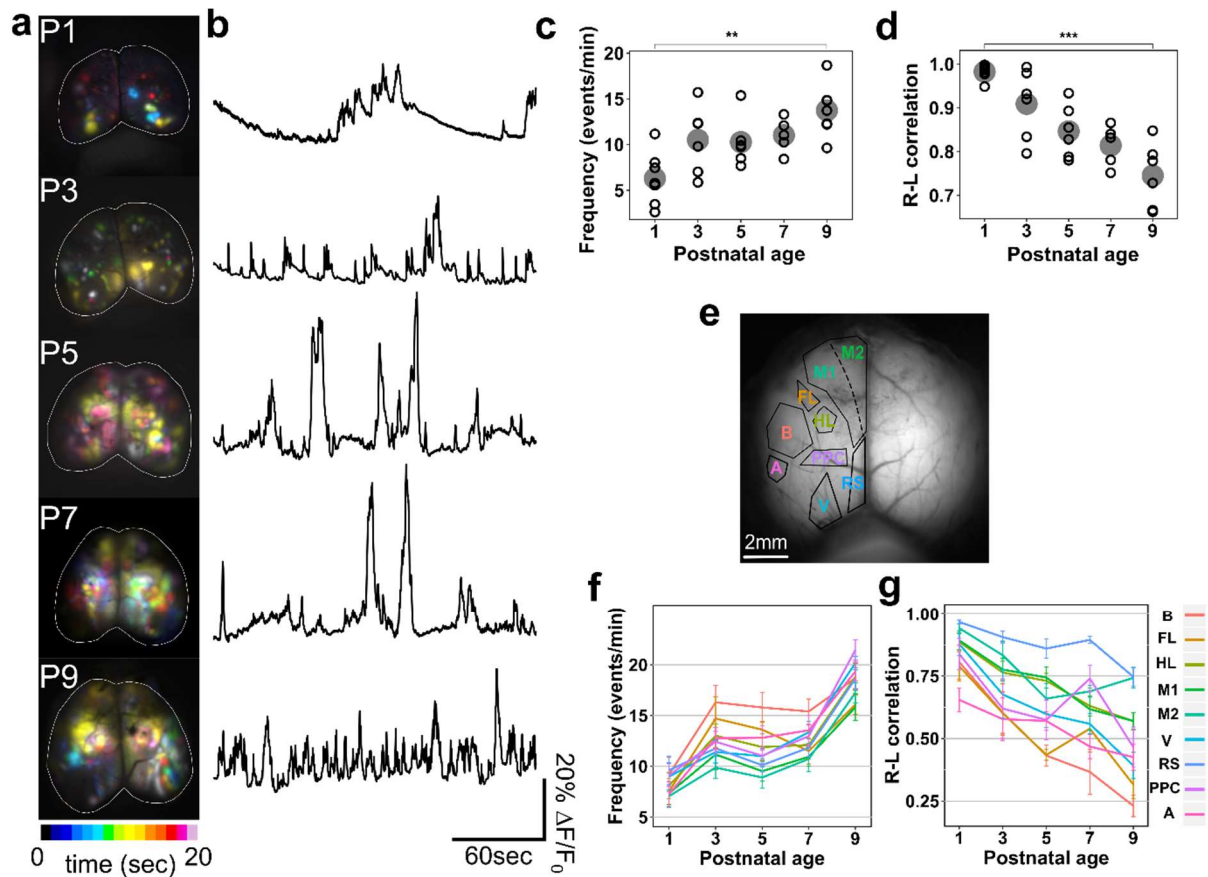

**Figure 1. Developmental changes in spontaneous activity across the cortex**

- a. Time projection maps showing representative spontaneous activity across a 20 second epoch at ages from P1-9.  
 b. Representative fluorescence traces from whole cortex areas (white lines shown on images in (a)).  
 c. The frequency of cortical spontaneous activity increases across postnatal development ( $p < 0.001$ , one-way Kruskal-Wallis test).  
 d. Spontaneous activity becomes less bilaterally correlated with postnatal development ( $p < 0.001$ , one-way ANOVA).  
 e. Schematic of cortical regions used to parcellate calcium imaging recordings for regional frequencies overlaid on raw fluorescence image.  
 f. Frequency of spontaneous activity increases with age in all cortical regions with a similar developmental trajectory.

134 activity ranged from highly localised transients or waves to simultaneous, coordinated  
 135 activation of multiple areas. Time projection maps across 20 seconds of imaging in  
 136 animals of ages spanning P1-P9 exemplify the spatiotemporal diversity of spontaneous  
 137 activity (Figure 1a). Spontaneously occurring activity was observed from P1, but the  
 138 frequency of activity transients across the entire cortex increased with postnatal  
 139 development (Figure 1a-c) ( $p < 0.001$ , one-way Kruskal-Wallis test;  $n(\text{animals})$ : P1 =  
 140 7, P3 = 6, P5 = 6, P7 = 6, P9 = 7). As coordination of neural activity between  
 141 hemispheres is known to be developmentally regulated, we compared activity in each  
 142 hemisphere to establish the ability of our approach to identify trajectories of neonatal  
 143 brain maturation. We found almost complete temporal inter-hemispheric correlation of  
 144 spontaneous activity just after birth (at P1), and this coordination progressively

145 decreases with postnatal age (Figure 1d) ( $p < 0.001$ , one-way ANOVA). At P9 inter-  
146 hemispheric correlation was  $0.75 \pm 0.07$ , which is still higher than the  $\sim 0.5$  seen in the  
147 adult cortex (Mohajerani et al., 2010). When broad cortical regions were delineated  
148 (based on a scaled brain atlas) and investigated individually (Figure 1e), the trajectory  
149 of the age-dependent increase in frequency of spontaneous activity was similar across all  
150 regions (Figure 1f). It was evident that there was marked transition in the frequency of  
151 spontaneous activity within each individual region, firstly between P1 and P3 and then  
152 between P7 to P9 (Figure 1f). In contrast, the broader inter-regional coordination  
153 exemplified by inter-hemispheric correlation followed a steadier developmental reduction  
154 (Figure 1g). It is notable, however, that the developmental reduction in inter-  
155 hemispheric correlation proceeded at quite different rates in different regions,  
156 highlighting the variability in maturation of long-range functional networks (Figure 1g).

157 A variety of spatial motifs of stereotypical spontaneous activity are observed in these  
158 recordings, ranging from moments when individual regions were selectively activated to  
159 coordinated patterns suggesting broader functional network activity that characterises  
160 mature brain function (Chan et al., 2015; White et al., 2011; Wright et al., 2017). To  
161 objectively assess the contribution of different activity patterns across developing cortex,  
162 we used a non-negative matrix factorization (NMF) approach on aligned images from  
163 animals aged P3, P5, P7 and P9 (activity at P1 was so temporally sparse and spatially  
164 widespread that NMF was ineffective). NMF yields a representation of the data in terms  
165 of spatial activity motifs and their levels of activation over time, which allows  
166 identification of common patterns of cortical activation (Figure 2a)(Mackevicius et al.,  
167 2019). Furthermore, the number of motifs needed to explain variability in the data allows  
168 quantification of the complexity of the underlying coactivation patterns. Running NMF  
169 on 3 minute image sequences identified several similar spatial motifs that often recurred  
170 in different animals and across recordings (Figure 2b). Several of these common motifs  
171 correspond to activity in sensory areas, in particular somatosensory and visual cortex,  
172 as might be expected from previous neonatal recordings of neural activity (Figure 2b).  
173 There were also more complex, multi-area motifs that were prominent amongst the  
174 variety of patterns (Figure 2b). To assess developmental changes in the variety of spatial  
175 motifs, we ranked the motifs by the amount they contributed to each recording overall.  
176 We then measured the number of motifs required to explain 75% of the total variance  
177 of the activity (Supplementary Figure 2). Early in development, fewer motifs accounted  
178 for much of the activity, but, with increasing age, the number of identified motifs  
179 contributing increased (Figure 2c). This increase in the number of contributing motifs

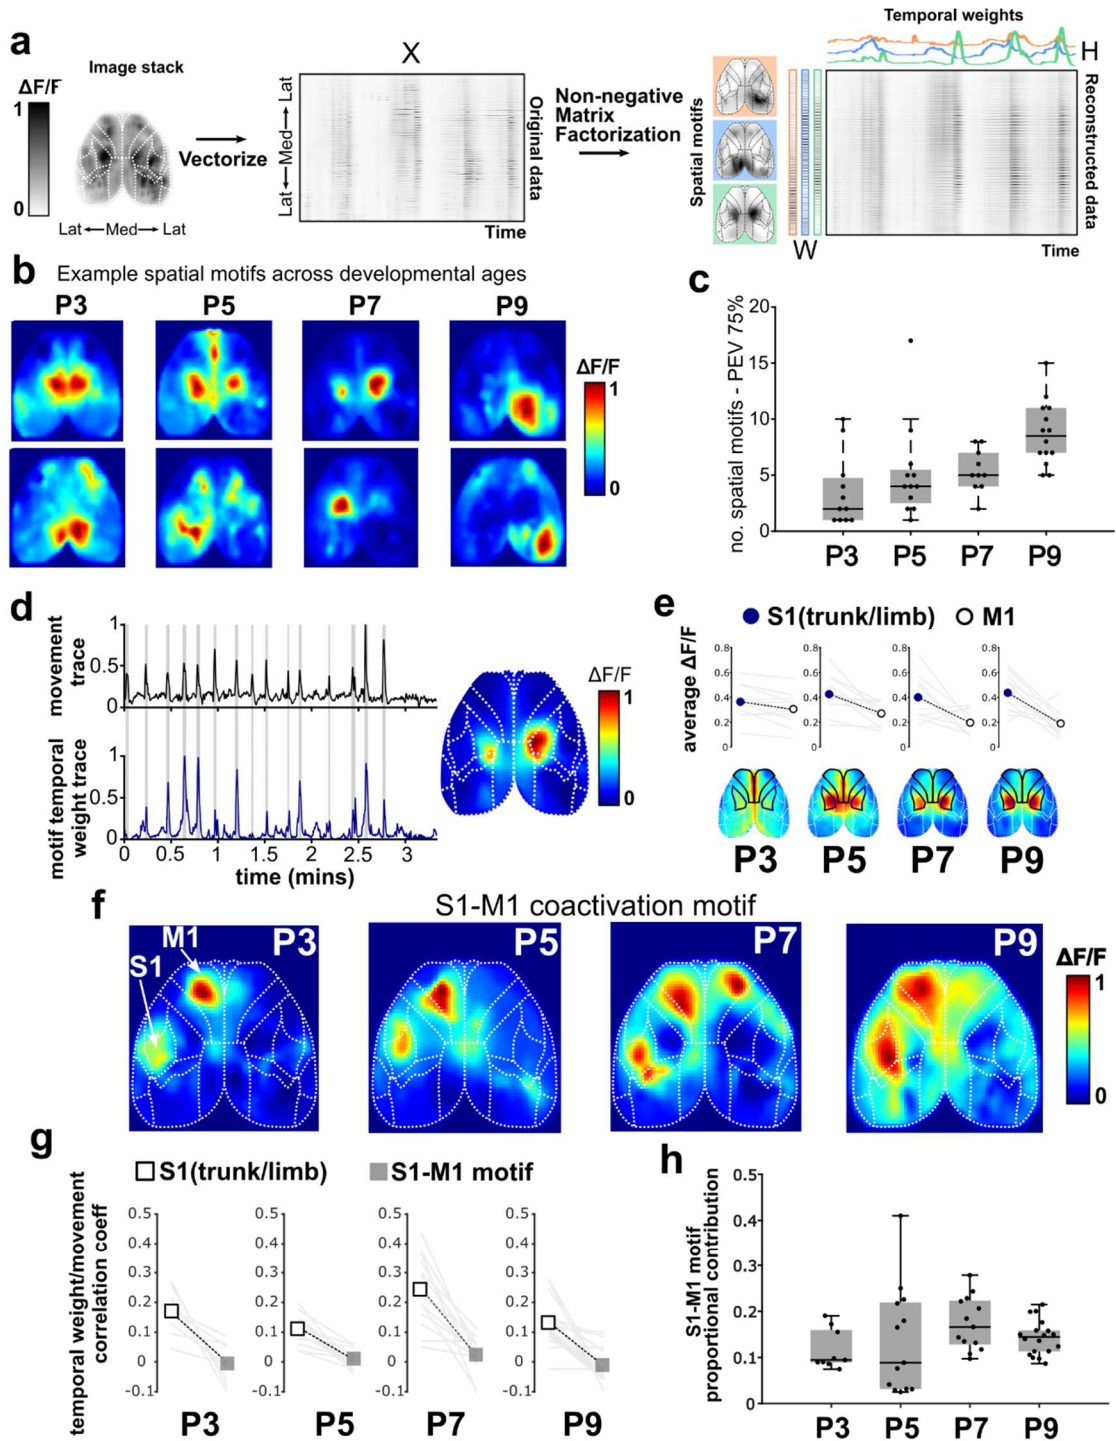

**Figure 2 - Non-negative Matrix Factorization to identify common spatial motifs of activity across development.**

a. Process schematic for NMF of image sequences.

b. Example spatial motifs of activity extracted by NMF at each postnatal age analysed.

c. The average number of individual motifs needed to explain 75% of the variance in the data increases with postnatal age.

d. Body movement detected by pressure sensor (upper panel - movement bouts shaded in grey) correlates strongly with the temporal weighting of a particular motif (lower panel) characterized by activity centered on the trunk/limb area of somatosensory cortex (S1) (map overlaid with regional parcellation).

e. At all ages tested, the movement-related motif has far greater activity in S1 than in motor cortex (M1).

f. Example motifs at each developmental age characterised by simultaneous activity in M1 and in whisker-related S1.

g. The S1-M1 coactivity motif makes a substantial contribution to overall patterns of activity at each age between P3-P9.



181 suggests that patterns of spatial activity rapidly become more complex in these neonatal  
182 stages.

183 Up to this point, we have grouped all activity regardless of behavioural state.  
184 However, all the animals displayed uncoordinated, brief and sporadic movements during  
185 the imaging, which were recorded using a pressure sensor placed under the body (Figure  
186 2d, Supplementary Figure 3a). These movements accounted for, on average, ~10-15% of  
187 the total recording duration across all the neonatal ages studied (Supplementary Figure  
188 2b). To assess whether this movement was related to particular patterns of cortical  
189 activity, we compared the temporally weighted trace of each extracted NMF motif,  
190 which indicates the time and amplitude at which that motif occurs, with the signal from  
191 the movement sensor (Figure 2d). In all cases, the strongest correlation with movement  
192 was from activity motifs characterised by bilateral activation of a large mid-parietal area  
193 that aligns broadly with the location of trunk- and limb-associated somatosensory cortex.  
194 However, there was little apparent activity in the more frontal regions where motor  
195 cortex is located (Figure 2d). Indeed, across the developmental period we studied, up to  
196 P9, movement was much more strongly associated with activity in somatosensory rather  
197 than motor cortex (Figure 2e). A disconnect between motor cortex activity and  
198 movement in early postnatal rodents has been described previously (Dooley and  
199 Blumberg, 2018) and contrasts with the mature brain, in which spontaneous locomotion  
200 is associated with activation of large areas of the dorsal cortical surface, including motor  
201 cortex (West et al., 2020). However, among the other motifs detected by NMF, there  
202 was a commonly occurring pattern at all ages tested between P3 to P9 that did involve  
203 the activity in the motor cortex. This motif was characterised by simultaneous activation  
204 of the predicted site of primary motor cortex (M1) and primary somatosensory cortex  
205 (S1), centred on the predicted site of the barrel cortex (Figure 2e). In contrast to the  
206 trunk-limb activity motif described earlier (Figure 2d), this S1-M1 co-activity did not  
207 correlate with signal detected by the pressure sensor, suggesting it is not related to  
208 movement (Figure 2f). To assess the prevalence of this S1-M1 co-activity pattern, we  
209 measured the contribution of this motif to data reconstructed from all the motifs  
210 identified by the NMF. The S1-M1 co-activity motif appeared in recordings across all  
211 ages and, on average, accounted for 10-20% of the reconstructed data (Figure 2g). This  
212 recurring spontaneous coactivation of somatosensory and motor cortex suggests that  
213 there may be a sensorimotor functional network even at very early stages of  
214 development.

## 215 Sensorimotor network coactivity

216 To explore the development of activity in specific sensory-related networks more  
217 precisely, we investigated the dynamic coordination of whisker-related S1 barrel cortex  
218 with other cortical regions. We used seed pixel maps (SPMs) to display cross-correlation  
219 between the fluorescence timecourse in S1 barrel cortex and all other pixels across each  
220 3 minute recording. These maps revealed little region-specific correlation at P1. In  
221 contrast, in some P3 animals and in all animals at older ages, there was a strong  
222 correlation between activity in S1 and an ipsilateral frontal region that aligns with the  
223 location of primary motor cortex (M1) (Figure 3ai) (Ferezou et al., 2007; Kuroki et al.,  
224 2018; Mayrhofer et al., 2019; Vanni and Murphy, 2014). Furthermore, in some of these  
225 SPMs, there were also smaller areas of elevated S1 correlation. One of these was just  
226 lateral to S1, matching estimated location of secondary somatosensory cortex (S2). The  
227 other was just rostral and medial to the M1 area that matches estimated location of  
228 secondary motor cortex (M2). Both S2 and M2 are known to have reciprocal connections  
229 with S1 in the mature rodent brain (Aronoff et al., 2010; Chakrabarti and Alloway, 2006;  
230 Manita et al., 2015). These peaks of elevated correlation suggest that, overall, activity  
231 in S1 tends to be temporally coordinated with activity in motor-associated regions.  
232 Therefore, even in the early neonatal brain, cortical sensory areas form long-range  
233 functional networks reminiscent of those seen in the mature brain (Ferezou et al., 2007).

234 The consistency of these SPMs increased with postnatal age, with defined regions in  
235 S1 and M1 being present in only a few recordings at P3 and becoming progressively  
236 more prevalent until all recording blocks produce clear maps at P9. This increasing  
237 clarity in S1-M1 correlation suggests there is a developmental strengthening of the  
238 sensorimotor functional network.

239 Reciprocal SPMs centred in M1 revealed similar, but not identical, patterns of  
240 correlation (Figure 3aii). The elevated correlation between M1 and S1 was evident in  
241 these M1-centered SPMs alongside additional areas of high correlation, such as in  
242 contralateral motor regions (Figure 3aii). The fact that S1-centered SPMs and M1-  
243 centered SPMs are not the same shows that although spontaneous activity S1 and M1  
244 are coordinated some of the time, they are not always co-active or exclusively coupled.

245 As SPMs do not reveal information about individual moments in time, we assessed  
246 potential coactivity associated with individual spontaneous S1 transients. To do this, we  
247 identified peaks in the fluorescence timecourse from S1 and M1 excluding periods

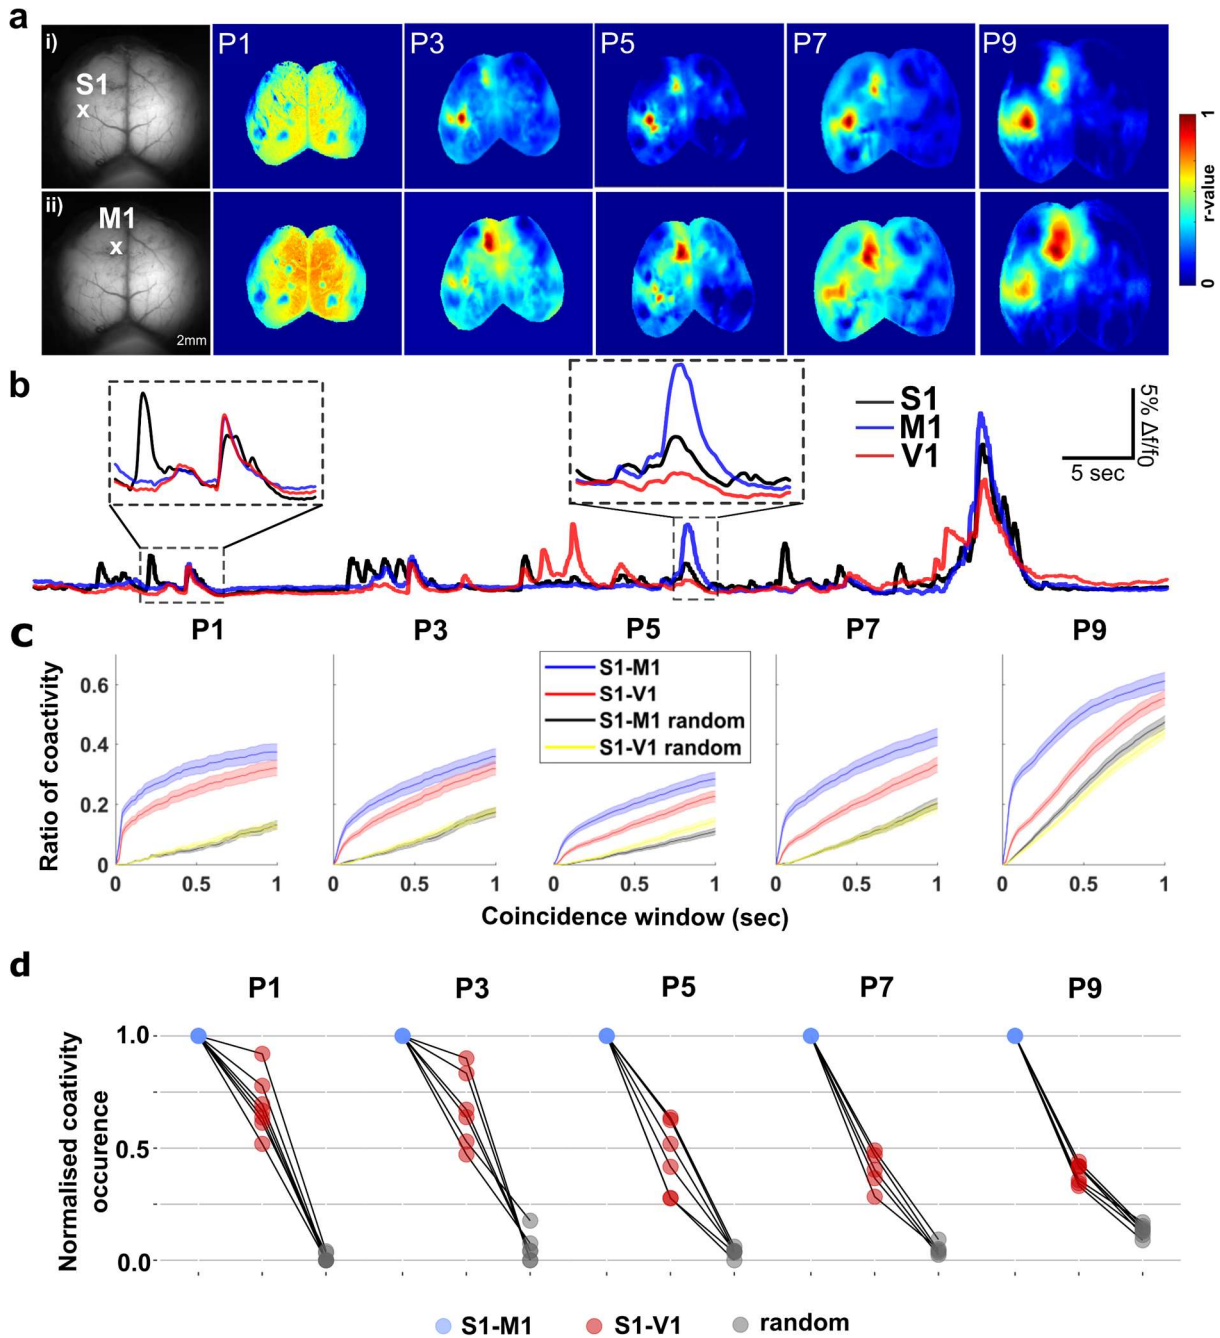

**Figure 3. Spontaneous activity in S1 is highly correlated with M1 in the early postnatal brain.**

a. i) Representative correlation maps from a seedpixel in the barrel cortex from P1-9, during 200s of spontaneous activity. ii) SPM in motor cortex for the same example recordings as i). These show sensorimotor network coordination emerges at P3 and is present across all ages until P9.

b. Fluorescence timecourse of pixels located in S1 (black), M1 (blue) and V1 (red). Magnified sections (dashed boxes) show differential prevalence and timings of activity peaks in the different regions.

c. The proportion of events in S1 that coincide with M1 activity (blue) is higher than V1 activity (red), showing preferential network coordination between S1 and M1. Both regions have higher coincidence than randomly selected time-points, showing that all spontaneous cortical activity is more coordinated than random. Plot shows mean  $\pm$  SEM across different coincidence windows.

d. Coactivity occurrence within a time window of 100ms of individual animals, normalised to the M1 ratio shows that V1 and random event coactivity is less frequent in all animals.

248 associated with movement detected by our pressure sensor. We then assessed whether

249 each peak of S1 activity coincided with a peak in M1 activity (Figure 3b). To capture  
250 the possibility of slightly offset timing of peaks in the different regions, a sliding time  
251 window was used to identify and measure the proportion of S1 events associated with  
252 M1 coactivity at different lags (Figure 3b). Coactivity between S1 and visual cortex  
253 (V1) was used as an unrelated cortical comparator. For each recording, we also compared  
254 to the proportion of coactivity that could be driven at chance level by measurement of  
255 coincidence at a matched number of randomly selected timepoints in both M1 and V1  
256 timeseries. The proportion of coactive events increases as the coincidence window  
257 lengthens (Figure 3c). As might be expected, for randomised event timings, this increase  
258 manifests as a steadily increasing proportion, with gradient dependent on the frequency  
259 of events (Figure 3c). However, at all ages coactivity was higher between S1 and M1  
260 than between S1 and V1 or random timepoints, showing that there is a preferential  
261 coordination of individual bouts of activity in S1 and M1 (Figure 3c). There is a rapid  
262 increase in the proportion of coactive S1-M1 events up to a ~100ms duration window,  
263 with a gentler gradient of increase after this point in both M1 and V1 that is comparable  
264 to random coincidence. This change in gradient in the cortical regions suggests there is  
265 an elevated level of biologically driven coordinated events that have their peaks  
266 coinciding <100ms apart. Comparing coincident S1-M1 activity within a 100ms window  
267 to S1-V1 and random timings in each animal, both M1 and V1 more likely to be co-  
268 active with S1 events than predicted by chance (Figure 3d). However, compared to V1,  
269 M1 activity is more likely to be coincident with S1 activity at all ages (Figure 3d). The  
270 relative proportion of S1-M1 coactivity compared to S1-V1 increases with postnatal age,  
271 suggesting that S1 activity is increasingly preferentially associated with M1 co-activation  
272 as the brain matures, resulting in a developmental strengthening of this functional  
273 network.

## 274 [Sensorimotor network event categorisation](#)

275 While we have found evidence of a maturing sensorimotor functional network, many  
276 spontaneous S1 events were not accompanied by coactivity in M1 (Figure 4a). To further  
277 investigate this, we categorised the spatial organisation of individual S1 spontaneous  
278 events. Cortical activation patterns of each spontaneous event in S1 were assigned to  
279 being S1-M1 coactive or non-coactive, dependent on whether there was any coincident  
280 activity in the M1 region at the peak of the S1 response (Figure 4a).

281 The average frequency of non-coactive events did not change between P1 and P9  
282 (Figure 4bi) ( $p = 0.13$ , one-way ANOVA,  $n$ : P1 = 7, P3 = 6, P5 = 6, P7 = 6, P9 = 7)

283 whereas there was a significant increase in the number of S1-M1 coactive events across  
284 development (Figure 4bii) ( $p < 0.001$ , one-way Kruskal-Wallis test). This difference in  
285 change of frequency means that there is a progressive developmental increase in the ratio  
286 of coactive:non-active events between P1 and P9 (Figure 4c;  $p < 0.001$ , one-way Kruskal-

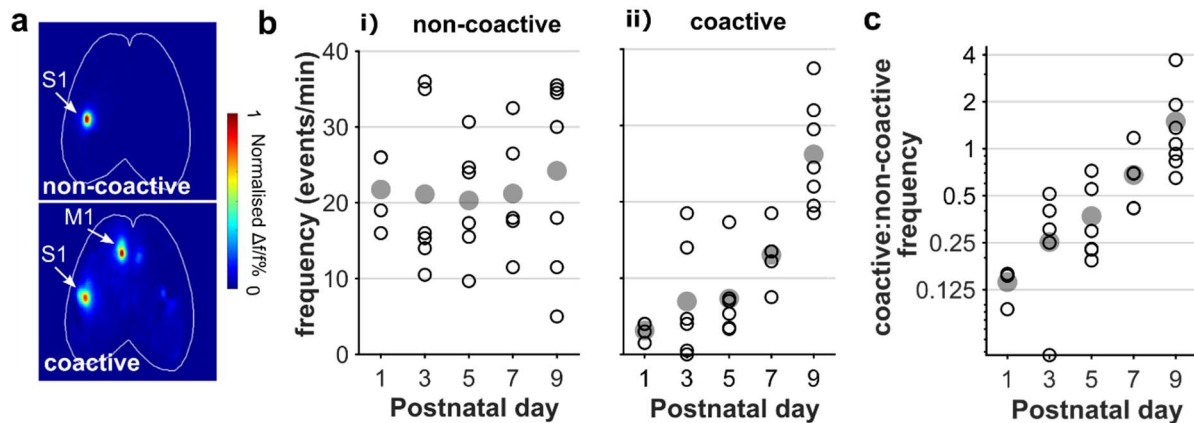

**Figure 4. Coordinated S1-M1 spontaneous activity increases across early postnatal development.**

a. Example activity maps from times coinciding with peaks of spontaneous activity in S1 (barrel cortex) fall into categories characterised by either lack of M1 activity (non-coactive, upper image) or distinct co-activation of M1 (coactive, lower image).

b. i) The frequency of non-coactive events does not change with development ( $p = 0.13$ , one-way ANOVA) but (ii) there is a significant increase in coactive events from P1-9 ( $p < 0.001$  Kruskal-Wallis test). Grey circles are mean of recordings in each animal.

c. This differential development in event type results in an increasing ratio of coactive to non-coactive events across early postnatal development ( $p < 0.001$  Kruskal-Wallis test).

287 Wallis test,  $n$ : P1 = 7, P3 = 6, P5 = 6, P7 = 6, P9 = 7). These results further support  
288 a strengthening on the functional connectivity between S1 and M1 during this early  
289 neonatal period.

## 290 Sensory-evoked cortical activity

291 Whisker deflection during rest stimulates neuronal activity in both S1 and M1 in  
292 adult (Ferezou et al., 2007; Mayrhofer et al., 2019; Mohajerani et al., 2013) and juvenile  
293 (McVea et al., 2017; Quairiaux et al., 2011) rodents. That type of multi-region activity  
294 is reminiscent of spontaneous S1-M1 functional network activity we have found in very  
295 early neonatal pups. Therefore, hypothesising that sensory stimulation in neonatal  
296 animals would drive activity that engages this S1-M1 network, we deflected whiskers  
297 while imaging cortical activity. A single deflection of individual whiskers in neonatal  
298 mice aged P3 and P7 activated contralateral barrel cortex (Figure 5a) in a  
299 topographically organised manner (Figure 5b), as anticipated from previous studies  
300 (Mitrukina et al., 2014; Yang et al., 2013). However, this S1 activity produced no clear  
301 activity in motor regions (Figure 5a) at either age. We assessed the timecourse of

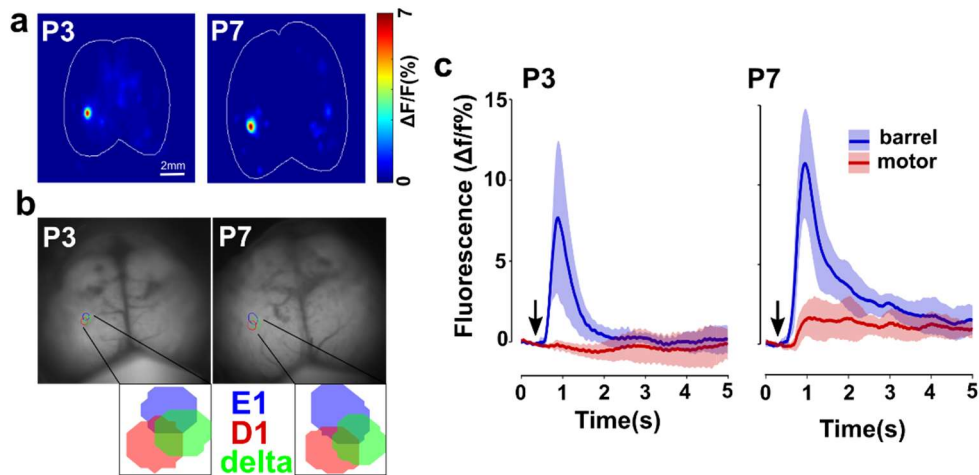

**Figure 5. Deflection of a single whisker evokes activation of the contralateral S1 in the first postnatal week.**

a. Deflection of a single whisker stimulates discrete activity in the contralateral barrel. Example heatmaps of average activity from 20 stimulations from postnatal day 3 & 7.

b. This activity is topographically organised. Example regions of activation for deflection of whisker D1 (red), E1 (blue) and delta (green), with closer detail in ii).

c. Activation of the S1 (blue) is not accompanied by M1 (blue) activation following whisker stimulation (arrow marker). Average ( $\pm$  SD) timeseries of both D1 and E1 (P3, n=5; P7, n=7).

302 fluorescence around whisker deflection in S1 and M1 regions identified as preferentially  
303 coactive in spontaneous recordings (Figure 5c). There was a strong S1 activation time-  
304 locked to the stimulation but little effect in M1 at either P3 or P7 (Figure 5c; n: P3 =  
305 5, P7 = 7)). This contrasts with the spontaneous coactivity of S1 and M1 in pups of this  
306 age (Figures 3 & 4). So why is M1 not activated by whisker deflection when the  
307 spontaneous activity suggests that there is already functional connectivity between these  
308 two cortical areas?

309 We reasoned that single deflection of a single whisker simply may not be a strong  
310 enough driving force to stimulate M1 activity. Therefore, to investigate the consequences  
311 of more robust S1 activation, we imaged cortical responses to multi-whisker stimulation  
312 in animals aged between P1-9. Deflection of the whiskers again triggered a short-latency  
313 activation of contralateral S1 that was already present at P1 (Figure 6a; n(animals): P1  
314 = 7, P3 = 6, P5 = 6, P7 = 6, P9 = 7). The activity was larger amplitude and more  
315 spatially widespread than that triggered by single whisker stimulation but was again  
316 largely restricted to somatosensory cortex (Figure 6a; single:multi-whisker % of cortex  
317 activated - P3, 0.30:0.85; P7, 0.48:1.26). In particular, this sensory stimulation did not  
318 result in robust activation of M1 at any age between P1 and P9 (Figure 6b).

319 We directly compared the properties of sensory-evoked and spontaneous events in S1  
320 for each animal. Stereotyped responses were reliably evoked by each multi-whisker  
321 stimulus (Figure 6c). By comparison, spontaneous activity within the same region was  
322 much more variable in amplitude and kinetics (Figure 6c). Indeed, comparison of their

323 relative amplitude showed that most spontaneous events were, on average, smaller than  
 324 evoked events across all ages (Figure 6d). This was the case for both S1-M1 coactive and

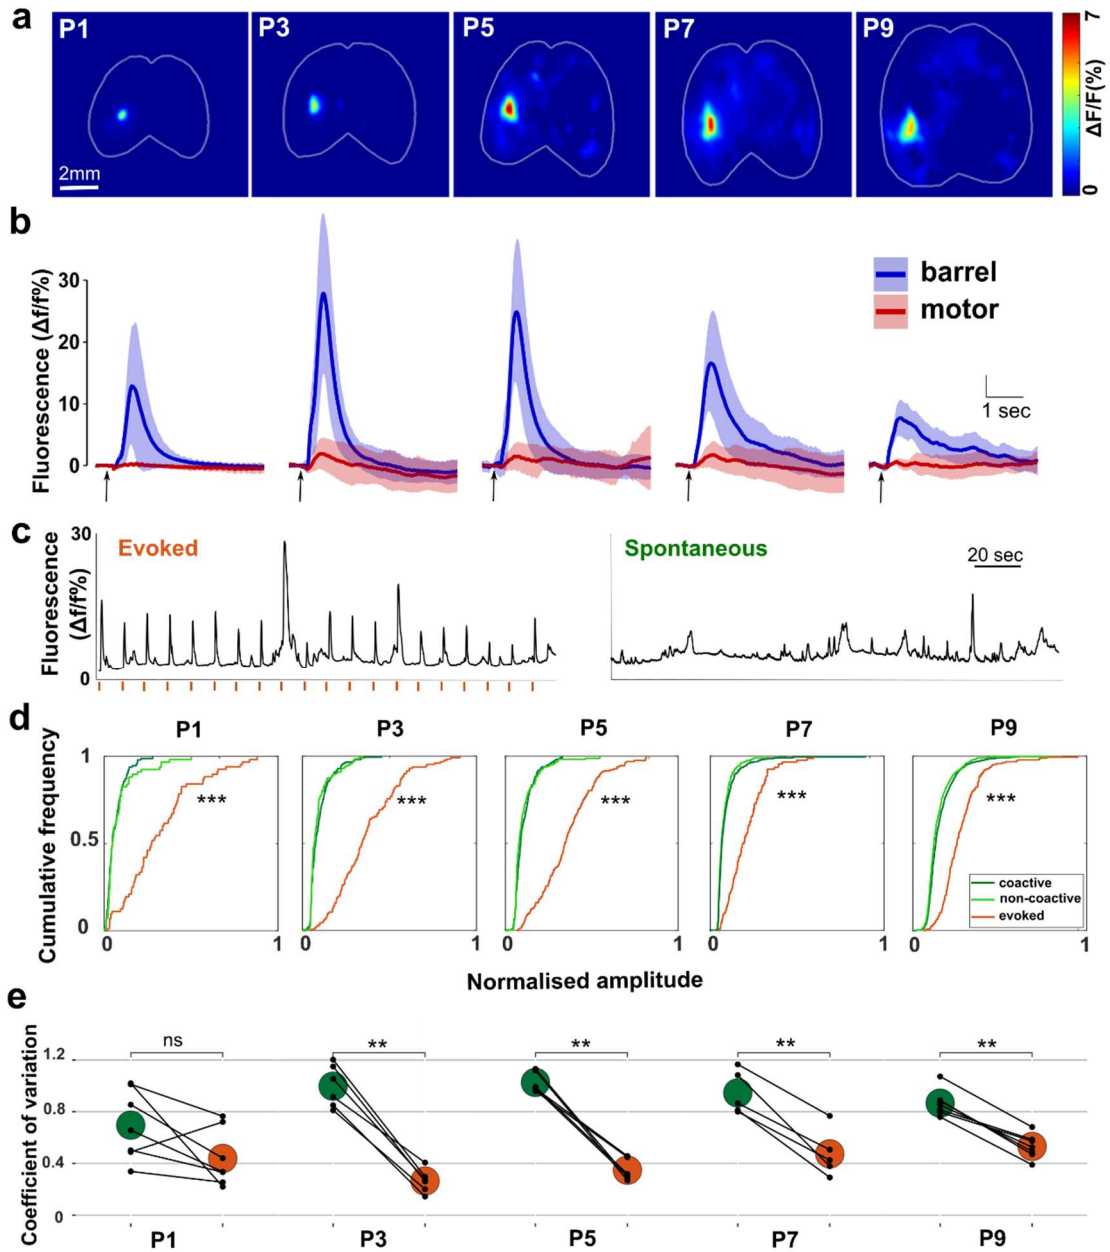

**Figure 6. Deflection of multiple whiskers evokes activity in contralateral S1 but not M1 in early postnatal mice.**

a. A single deflection of multiple whiskers simultaneously results in activation of the contralateral barrel cortex (S1) from P1 to P9. Example heatmaps of average activity from 20 stimulations.

b. Activation of S1 (blue) following whisker stimulation (black arrow marker) is not accompanied by M1 (red) activity. Average ( $\pm$  SD) timeseries.

c. Example events of both whisker evoked (orange lines mark stimulation times) and spontaneous activity in S1.

d. Amplitudes of spontaneous S1 activity (both coactive and non-coactive) is smaller than whisker evoked events from P1-P9 ( $p < 0.0001$ , K-S test). Plot showing the cumulative frequency of amplitude of individual spontaneous (green) and evoked (orange) events in S1, normalised to maximum amplitude.

e. The amplitudes are more variable for spontaneous events, with the coefficient of variance in spontaneous recordings being significantly higher than stimulated events from P3-9 ( $p < 0.01$ , two-way repeated measures ANOVA - paired within animal). (n: P1 = 7, P3 = 6, P5 = 6, P7 = 6, P9 = 7).

325 non-coactive events, which had similar amplitude distributions (Figure 6d). Notably,  
326 though, some spontaneous events were of similar amplitude to evoked responses.  
327 Variability (quantified as coefficient of variation) of spontaneous event amplitude was  
328 higher than evoked responses in all but one animal. Comparison across development  
329 showed that there was significantly more variability in spontaneous activity than evoked  
330 activity from P3 up to P9 ( $p < 0.01$ ) (Figure 6e).

331 The spatiotemporal variability in the S1 spontaneous event and the differential spatial  
332 properties of whisker-evoked suggests that there may be distinct drivers of spontaneous  
333 activity within the sensorimotor network. We have shown that passive whisker  
334 stimulation can drive S1 activity, but it is unclear whether S1-M1 co-activity also relies  
335 on the classical activation of peripheral sensory pathways.

### 336 [Silencing the sensory periphery alters spontaneous cortical activity](#)

337 To assess the contribution of peripherally generated spontaneous activity to the  
338 sensorimotor cortical network, we acutely silenced the whisker-related sensory drive. To  
339 achieve this, we measured evoked and spontaneous cortical activity in P7 animals before  
340 and after the local anaesthetic lidocaine was injected into the right whisker pad.

341 Lidocaine injections successfully silenced the right whisker pad, consistently producing  
342 almost complete inhibition of the contralateral S1 activation driven by whisker  
343 stimulation (Figure 7abc). In contrast to whisker deflection-evoked activity, a  
344 substantial amount of spontaneous activity was still apparent even after silencing of the  
345 whisker pad. The lidocaine injection did reduce the frequency of spontaneous events in  
346 contralateral S1 ( $p > 0.001$ , paired t-test,  $n = 7$ ) and in M1 ( $p = 0.019$ , paired t-test,  $n$   
347  $= 7$ ), but ~60% of S1 and ~85% of M1 activity remained (Figure 7d). As expected, there  
348 was no change in the frequency of spontaneous activity in the ipsilateral hemisphere (S1  
349 –  $p = 0.061$ ; M1 –  $p = 0.383$ , paired t-test,  $n = 7$ ) (Figure 7d). Therefore, it appears  
350 that activity from the periphery drives some, but not all, of the activity in the  
351 sensorimotor cortical network and its silencing has the greatest impact on activity in S1.  
352 To assess whether peripheral drive is associated with particular modes of spontaneous  
353 cortical network activation, we measured the effect of lidocaine injection on the  
354 prevalence of S1 non-coactive and S1-M1 coactive events in the contralateral hemisphere.  
355 Silencing of the whisker pad caused almost complete inhibition of S1 non-coactive events  
356 ( $p < 0.001$ , paired t-test,  $n=7$ ) but only a partial (~50%) reduction in the frequency of  
357 S1-M1 co-activity ( $p = 0.006$ , paired t-test,  $n=7$ ) (Figure 7e). This resulted in a shift  
358 towards coordinated S1-M1 activity, dramatically increasing the ratio of coactive to non-



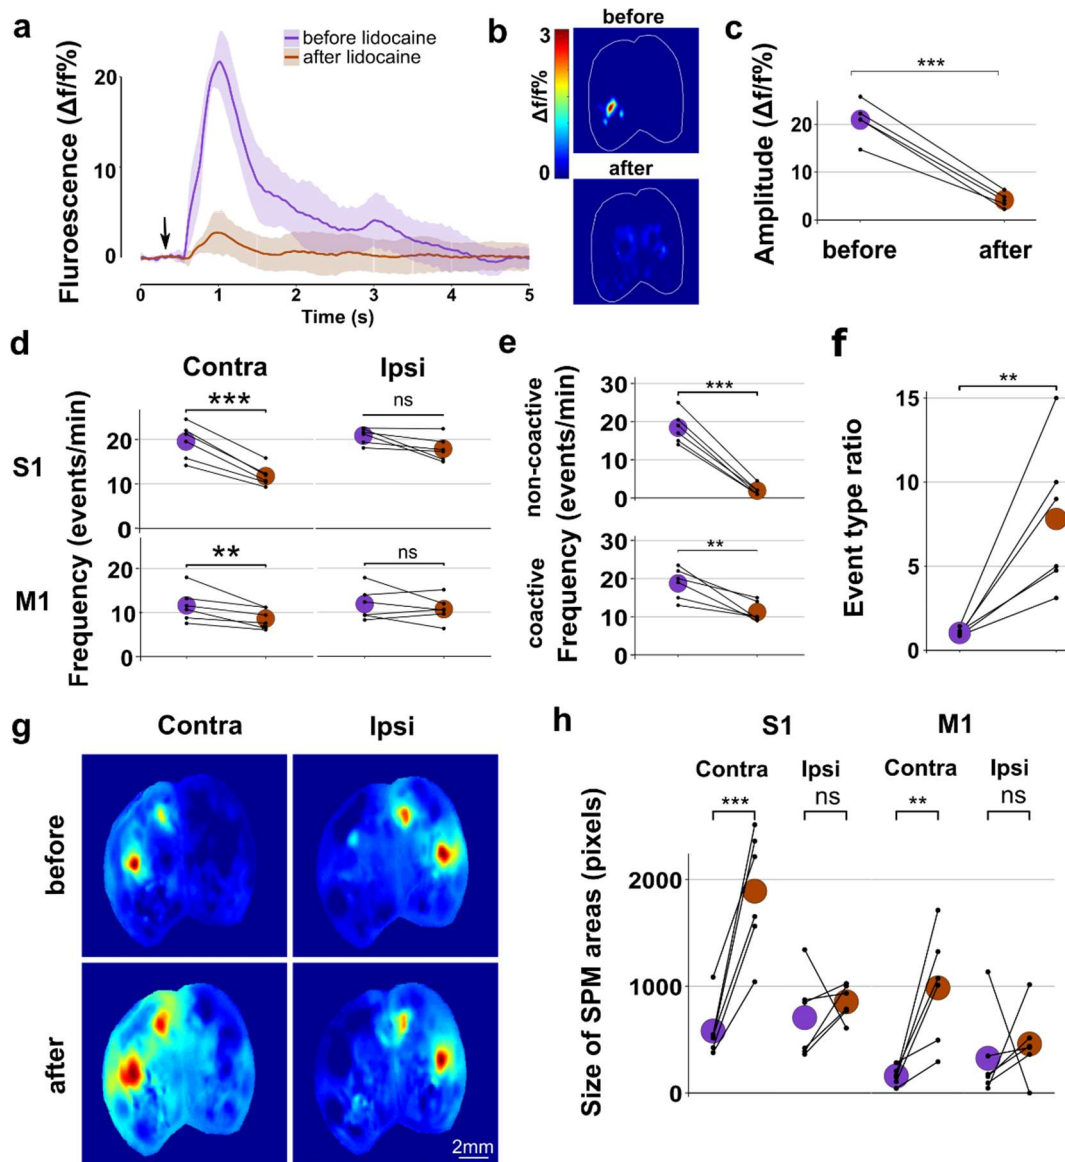

**Figure 7. Spontaneous cortical activity is partially driven by the periphery**

a. Silencing of the whisker pad with lidocaine injection eliminated cortical activation by whisker stimulation. Plot of average ( $\pm$ SD) activity of S1 in the 5s period following stimulation (black arrow marker).

b. Heatmaps showing the loss of specific spatial activation.

c. The peak amplitude of the response in S1 is significantly reduced following lidocaine ( $p < 0.001$ , paired t-test)

d. There is a reduction in spontaneous activity in left (contralateral to injection) S1 after lidocaine administration ( $p < 0.001$ , paired t-test - grey circles = mean) and in left M1 ( $p = 0.019$ ) but not in the right S1 ( $p = 0.0611$ ) or in M1 ( $p = 0.383$ ).

e. The spatial patterns of individual events are altered by lidocaine administration. In the left (contralateral) hemisphere there is a significant decrease in both S1 only ( $p < 0.001$ ) and S1-M1 coactive ( $p = 0.006$ ) events.

f. This differential change in event frequency between types results in a significant increase in the ratio of coactive to non-coactive events ( $p = 0.012$ , paired t-test)

g. An example seedpixel maps centred on S1 showing an increase area of correlation after lidocaine in contralateral hemisphere. h. There is a significant increase in the size of correlated area in both contralateral S1 ( $p < 0.001$ , paired t-test) and M1 ( $P < 0.01$ ) but not in the ipsilateral hemisphere (S1 -  $p = 0.478$ ; M1 -  $p = 0.655$ ).

359 coactive events in the contralateral hemisphere (Figure 7f) ( $p = 0.012$ , paired t-test).  
 360 There was no change in the frequency of either coactive or non-coactive events in the

361 ipsilateral hemisphere (non-coactive:  $p = 0.345$ ; coactive:  $p = 0.206$ , paired t-test,  $n=7$ ).  
362 This preferential effect of lidocaine treatment on S1 localised activity also changed the  
363 overall spatiotemporal properties of correlations in spontaneous cortical activity, which  
364 was evident in S1-based SPMs (Figure 7g). Silencing the whisker pad increased the  
365 average correlation between contralateral S1 and M1, without affecting the ipsilateral  
366 hemisphere (Figure 7g). Also, there was an increase in the size of highly correlated areas  
367 in both contralateral S1 ( $p < 0.001$ , paired t-test) and M1 ( $p < 0.001$ ), but not in the  
368 ipsilateral hemisphere (S1 –  $p = 0.478$ ; M1 –  $p = 0.655$ ) (Figure 7h). Overall, these  
369 effects of peripheral silencing suggest that spontaneous activity that is restricted to S1  
370 comes largely through the classical sensory pathway. However, broader sensorimotor  
371 network activations involving coordination of S1 and M1 are less likely to arise from  
372 peripheral drive. Indeed, the majority of the spontaneous activation of the sensorimotor  
373 network is driven largely independent of the sensory periphery in these developing  
374 animals.

### 375 Sensory experience dependence of functional network development

376 It is well-established that early life sensory experience is necessary for the accurate  
377 formation for many sensory-driven neuronal networks (Colonnese & Khazipov, 2010;  
378 Daw et al., 1992; Feldman, 2009; Kevin Fox & Wong, 2005; Hensch, 2004a; Weller &  
379 Johnson, 1975). Given the early appearance of coordinated S1-M1 activity (Figure 3)  
380 and with it being different from sensory-evoked activity (Figures 5 & 7), we investigated  
381 whether spontaneous activation of the sensorimotor network is also influenced by  
382 neonatal sensory experience. We unilaterally trimmed all the whiskers each day from  
383 birth because developmental perturbation of whisker experience is known to alter the  
384 maturation of the neural pathways carrying sensory information to and within S1 (Ashby  
385 & Isaac, 2011; Feldman & Brecht, 2005; Fox, 1992). We investigated the effects of  
386 perturbing sensory experience by comparing cortical activity in animals that had  
387 undergone unilateral daily whisker trimming from birth to sham-trimmed littermates,  
388 imaging P3 and P7 animals (Figure 8a).

389 As we could not confirm the effect of trimming on the response to whisker deflection  
390 (because the whiskers were still trimmed at the time of recording), we took advantage  
391 of the fact that chronic unilateral whisker trimming has been shown to affect spatial  
392 properties of responses to deflection of the untrimmed whiskers on the other side of the  
393 face (Glazewski et al., 2007). Therefore, we measured the response to whisker deflection  
394 of the spared whiskers in groups of animals at P3 and P7. Multi-whisker deflection

395 triggered reliable activation of contralateral S1 (NB – ipsilateral to the trimmed  
 396 whiskers) similar to that described in earlier (Figure 6). However, by P7, the size of the

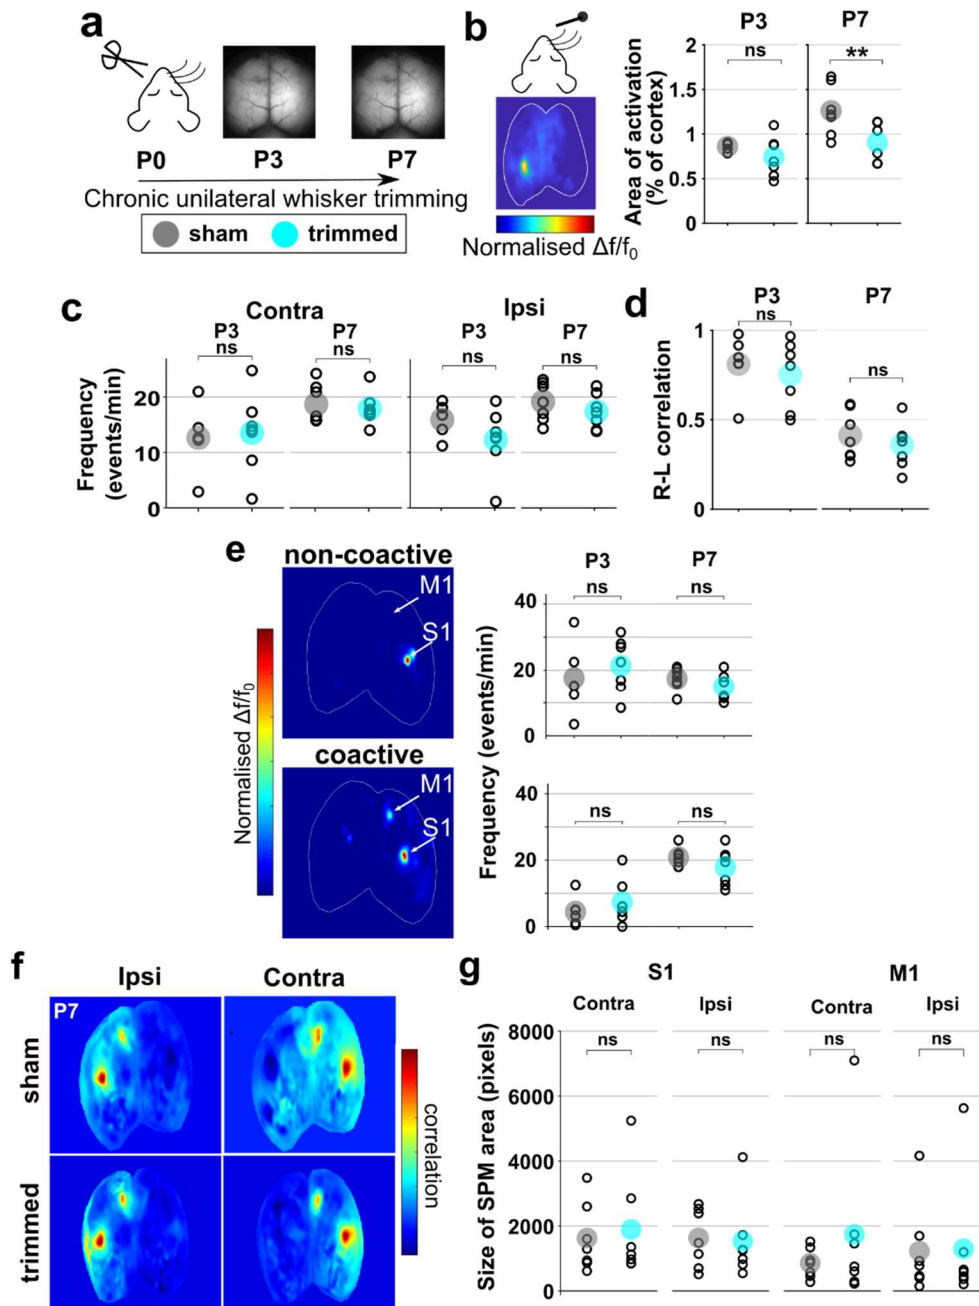

**Figure 8. Chronic sensory deprivation during early postnatal development does not alter the temporal or spatial properties of spontaneous cortical activity in the sensorimotor cortex**

**a.** Experimental timeline showing daily unilateral whisker trimming from P0 to P7, with imaging of spontaneous and spared whisker-evoked activity in P3 and P7 animals.  
**b.** Deflection of spared whiskers evokes activity in barrel cortex ipsilateral to trimmed whiskers, as shown in representative image. The area of cortex activated is smaller in whisker trimmed animals than sham controls at P7 ( $p = 0.03$ ), but not at P3 ( $p = 0.27$ ).  
**c.** The frequency of spontaneous events in S1 is not altered following chronic sensory deprivation in the contralateral ( $p = 0.99$ , two-way ANOVA,  $n = 7$ /group) or ipsilateral ( $p = 0.116$ , two-way ANOVA) hemisphere, at P3 or P7.  
**d.** The correlation of activity between the right and left barrel cortex is not altered in whisker trimmed animals compared to controls at either age ( $p = 0.327$ ).  
**e.** The frequency of individual spontaneous S1 non-coactive and S1-M1 coactive events in the contralateral cortex is not altered by whisker trimming (non-coactive;  $p = 0.899$ , coactive;  $p = 0.991$ , two-way ANOVA).  
**f.** Example seedpixel maps centered on S1 contralateral and ipsilateral to whisker trimming from P7 animals.  
**g.** At P7 there is no significant difference in the size of correlation area for S1 (contra-  $p = 0.946$ ; ipsi -  $p = 0.818$ , Wilcox test) or M1 (contra-  $p = 0.597$ ; ipsi -  $p = 0.946$ , Wilcox test)

397 activated area was significantly smaller in trimmed animals than in controls (Figure 8b;  
398 P3 – p = 0.27; P7 – p = 0.03, T-test). This shows that neonatal whisker trimming  
399 effectively altered the development of sensory-evoked responses, as expected.

400 Next, we compared spontaneous activity in the sensorimotor network in the trimmed  
401 and sham animals. The frequency of spontaneous events in contralateral or ipsilateral  
402 S1 was not altered by perturbation of sensory experience at either age (Figure 8c) (contra  
403 - p = 0.99, ipsi – p = 0.116, two-way ANOVA, n = 7/group). Correlation of spontaneous  
404 activity between the hemispheres was also unaffected by the whisker trimming (Figure  
405 8d) (p = 0.327), similar to the developmental decorrelation observed in the previous  
406 dataset (Figure 1d&g). When the spatial organisation of these S1 spontaneous events  
407 was categorised, we found that whisker trimming had not changed the frequency of non-  
408 coactive or coactive events in either the contralateral (S1 – p = 0.899, S1-M1 – p =  
409 0.991) or ipsilateral (S1 – p = 0.636, S1- M1 – p = 0.182) hemisphere (Figure 8e). The  
410 preferential coactivity in S1 and M1 was also similarly clear in S1 SPMs from P7 sham  
411 and whisker-trimmed animals (Figure 8f). To check whether there were more subtle  
412 changes in cross-correlation within the SPMs, we measured the size of highly correlated  
413 regions in S1 and M1. There was no change in the area of the correlated S1 and M1  
414 regions in either the contralateral (S1 – P = 0.946; M1 – p = 0.597, Wilcox test) or  
415 ipsilateral (S1 – P = 0.818; M1 – p = 0.946) hemisphere following chronic whisker  
416 trimming (Figure 8g). Overall, these data suggest, in contrast to sensory-evoked activity,  
417 that neonatal development of spontaneously generated activity in the sensorimotor  
418 network proceeds unabated even in the absence of normal whisker experience.

## 419 Discussion

420 Using widefield calcium imaging of the brain in mice pups (P1-P9), we have  
421 investigated the neonatal development of both spontaneous and sensory stimulus-evoked  
422 cortical activity. We found that functional connectivity between regions of the  
423 sensorimotor cortex is present from the beginning of the first postnatal week. This  
424 network coordination of whisker-related somatosensory and motor cortex is present  
425 during spontaneous activity but is not evoked by sensory stimulation at these young  
426 ages, even though sensory-driven activity does reach the cortex. This suggests there is  
427 a precocious network linking cortical regions that is, at least initially, largely independent  
428 of the maturation of the classical sensory pathway. Indeed, acute silencing of the whisker  
429 pad had relatively little effect on these spontaneous network activations compared to  
430 whisker-evoked or spontaneous activity that is restricted to barrel cortex. Furthermore,  
431 by trimming whiskers from birth, we have shown that the formation and initial  
432 maturation of this spontaneous sensorimotor network activity is independent of neonatal  
433 sensory experience.

### 434 Movement related activity

435 At the neonatal ages we have studied, movement of the body and limbs is poorly  
436 controlled, reflexive or spontaneous (i.e. twitches). We did not find much activity in  
437 motor cortical areas that was associated with periods of movement. This aligns with  
438 previous findings, which suggest that M1 control of movement starts later in  
439 development (Chakrabarty and Martin, 2000; Dooley and Blumberg, 2018; Young et al.,  
440 2012). Indeed, in our recordings, the vast majority of movement-related activity was  
441 found in centred in the trunk and limb-associated somatosensory cortex, suggesting that  
442 it is driven by the sensory consequences of the body motion (Figures 2 & S2)(Khazipov  
443 et al., 2004).

444 It has been shown previously that electrical somatosensory stimulation or myoclonic  
445 twitches during sleep can elicit responses in neonatal motor cortex neurons (An et al.,  
446 2014; Tiriach et al., 2014). It is possible that this type of reafferent signal is present in  
447 the motor areas in our recordings, as there are some hints of activity there (Figure S2),  
448 but they are dwarfed by the barrage of somatosensory activity. It is unlikely that our  
449 pressure-based sensor detected all forms of movement, particularly localised events such  
450 as myoclonic twitches (unless they result in touch of the body onto the sensor).  
451 Therefore, cortical activity associated with isolated twitches will be part of what we have  
452 termed “spontaneous” activity in our analysis. Whilst we have focussed in this study

453 on periods that are not associated with gross body movement, the cortical activity  
454 associated with movement is likely to play a significant role in the development of  
455 cortical circuitry.

#### 456 Development of spontaneous activity

457 Spontaneously generated activity is present across the cortex from P1, and the  
458 frequency increases with developmental age (Figure 1). Indeed, the relatively low  
459 frequency, intermittent activity seen at younger ages is reminiscent of the discontinuous  
460 EEG traces that characterise prenatal human babies (Tolonen et al., 2007; Vanhatalo  
461 and Kaila, 2006). By P9, there is almost continuous cortical activity, ranging from brief,  
462 spatially discrete transients to large travelling waves (Figure 1). Again mirroring EEG  
463 activity in human preterm babies, activity in the youngest animals was highly regionally-  
464 correlated across hemispheres (Figure 1). Despite the increasing frequency of activity,  
465 this inter-hemispheric regional coordination declined with age, perhaps reflecting the  
466 development of lateralized specialisation.

467 Whisker stimulation evokes activity in S1 from P1 (Figure 6a) and we found  
468 topographical organisation of individual barrels at P3 (Figure 5b). This agrees with  
469 previous findings of organised evoked activity from birth in rodents (Yang et al., 2013).  
470 This early S1 whisker-stimulated activity is not accompanied by consistent activation of  
471 M1, or any other areas, as is found in the more mature brain (Ferezou et al., 2007). As  
472 an isolated result this might suggest that functional connectivity between S1 and M1 is  
473 not yet established in this early neonatal period. However, when spontaneously occurring  
474 activity was analysed, preferential coactivity between S1 and M1 is clearly present from  
475 as early as P1 (Figures 2&3) (McVea et al., 2017). Furthermore, in the time-averaged  
476 activity SPMs from many animals, spontaneous S1 activation is highly correlated with  
477 distinct areas that align with projected location of M1, M2 and S2 (Figure 3). This  
478 suggests that a functional sensorimotor network between these areas is already  
479 established very early in development. The strength of correlation between spontaneous  
480 activity in these sensorimotor areas increases during the first postnatal week, indicating  
481 that the network does undergo a postnatal maturation process. Nonetheless, even by P9,  
482 even though deflection of the whiskers reliably drives activity in S1, it fails to engage  
483 this broader sensorimotor network. This suggests that the sensory pathway is somehow  
484 separated from this sensorimotor network and that they are developing in parallel. In  
485 line with the idea that there are parallel networks in early S1, when we analysed cortex-  
486 wide activity associated with individual spontaneous events there, we found they fell

487 into distinct types of spatial motifs. While there was spontaneous activation of S1 in  
488 patterns similar to those evoked by whisker deflection with activity largely restricted to  
489 S1 barrel cortex, there were also many spontaneous events where S1 and M1 were active  
490 simultaneously (Figure 4a). The S1-M1 coactive events became relatively more prevalent  
491 with age (Figure 4bc), perhaps reflecting a strengthening of the connections between  
492 those sensorimotor areas or an increased likelihood of triggering activity within that  
493 network.

#### 494 [What are the drivers of spontaneous activity?](#)

495 The varying intra-regional functional connectivity during spontaneous and evoked  
496 activity raises the question of whether there are different upstream drivers of these  
497 activity patterns. We know that whisker deflection drives activity from mystacial sensory  
498 receptors to the cortex via brainstem and thalamus (the classical sensory pathway)  
499 (Petersen, 2019). This evoked activity is blocked by local anaesthesia of the whisker pad  
500 (Figure 7).

501 Spontaneous neuronal activity originating in the periphery is well documented in the  
502 developing sensory networks, including visual, auditory, and somatosensory (Ackman et  
503 al., 2012; Akhmetshina et al., 2016; Babola et al., 2018; Mizuno et al., 2018; Torborg &  
504 Feller, 2005; Wang et al., 2015). However, it is not the only source of activity. In the  
505 developing visual cortex, as well as waves of activity originating in the retina, there are  
506 also cortically generated events (Siegel et al., 2012) and silencing of the somatosensory  
507 periphery does not eliminate all S1 activity (Yang et al., 2009). When we silenced the  
508 whisker pad there was a ~40% reduction in spontaneous activity in the contralateral S1  
509 (Figure 7d). These events may be triggered by myoclonic whisker twitches or  
510 spontaneous activation of sensory receptors (Gómez et al., 2021; Tiriác et al., 2012). The  
511 remaining 60% of spontaneous activity in S1 has an origin outside of the peripheral  
512 sensory neurons. The S1 activity left is preferentially coactive with M1 and this  
513 distinction may tell us something about the origins of the remaining spontaneous  
514 activity. In the mature brain there is substantial direct intracortical connection between  
515 S1 and M1 (Aronoff et al., 2010; Chakrabarti et al., 2008; Ferezou et al., 2007; Mao et  
516 al., 2011). These connections are between S1 layer II/III (Hooks et al., 2011) and M1  
517 layer V (Mao et al., 2011). Layer IV of S1 rapidly develops around the end of first  
518 postnatal week (Arakawa and Erzurumlu, 2015; Ashby and Isaac, 2011; López-Bendito  
519 and Molnár, 2003) with layer II/III following behind maturing around P12 (Stern et al.,  
520 2001). As well as immature inter-regional connectivity in the first postnatal week there

521 is a lack of direct glutamatergic intracortical S1 to M1 connection at P6 (McVea et al.,  
522 2017). However, M1 to S1 connectivity is present during this early postnatal period, in  
523 both excitatory and inhibitory neurons (Vagnoni et al., 2020). Coactivity between S1  
524 and M1 in the developing cortex is known to be bidirectional, and it has previously been  
525 found that peripheral silencing of the paw preferentially eliminates S1 to M1 spontaneous  
526 activity (An et al., 2014). The timescale of the calcium indicator used for this study  
527 means we do not have the temporal resolution to know for sure whether coactive events  
528 originate in S1 or M1, but the source being outside of S1 could explain the preferential  
529 resilience of coactive events to peripheral sensory neuron silencing.

530 Another possible source of spontaneous activity is the thalamus. The first 9 postnatal  
531 days are rapidly developing stage of thalamocortical connectivity in S1. The first  
532 postnatal week features TC migration and a critical window of plasticity in S1 layer IV  
533 (Crair and Malenka, 1995; Lu et al., 2001). Patchwork barrel-related spontaneous  
534 activity is evident in layer IV neurons before P9 and this is almost entirely driven from  
535 the sensory periphery via thalamocortical relay (Mizuno et al., 2018). This aligns with  
536 the largely S1 non-coactive events we have described, which also were entirely dependent  
537 on drive from the whisker pad (Figure 7). However, we also found spontaneous activity,  
538 largely S1-M1 co-activity, that did not come from the whisker pad (Figure 7). Overall  
539 this suggests that the spontaneous co-activity in the larger sensorimotor network at these  
540 young ages may not involve layer IV. The widefield imaging technique we used for this  
541 study captures neuronal activity from across the upper cortical layers including layer  
542 IV. As such, it is tempting to suggest that the different types of spontaneous activity  
543 patterns we have described may be segregated in different cortical layers. Although layer  
544 IV is the major TC input layer in S1, there are direct thalamic connections and long-  
545 range intra-cortical connections to layer II/III that could serve as independent drivers  
546 of spontaneous activity (Viaene et al., 2011). As the local connections between different  
547 layers mature, activity patterns may become less segregated. Indeed, after P9, there is  
548 a major functional switch, with spontaneous activity in barrel cortex layer IV becoming  
549 independent of the subcortical sensory pathway (Nakazawa et al., 2020). Whisker-driven  
550 sensory information reaches barrel cortex via both first order (ventroposteromedial  
551 thalamic nucleus (VPM)) and higher order (posterior thalamic nucleus (POM)) thalamic  
552 regions (Petersen, 2019). In adult rodents, it is known that POM (but not VPM) also  
553 has a direct synaptic connection to M1 (Chakrabarti and Alloway, 2006), raising the  
554 possibility that spontaneous POM activity could simultaneously drive S1 and M1.  
555 However, the neonatal development of these pathways is not yet well described.



556 As well as targeting multiple cortical layers, TC connections that are developing  
557 during this early postnatal period have been found to project to multiple cortical regions,  
558 some of which are developmentally transient connections and some which persist  
559 throughout adulthood (Henschke et al., 2015, 2017, 2018). These cross-modal  
560 connections may be responsible for coordinated cortical activity such as between S1 and  
561 M1 found in our study. It is known that these cross-modal connections have an important  
562 functional role in the development of individual sensory regions, with loss of one sense  
563 resulting in remodelling of TC connections in another (Dooley and Krubitzer, 2019;  
564 Moreno-Juan et al., 2017). During early postnatal development the subplate is an  
565 important relay area for peripheral to cortical connection, and like the thalamus, the  
566 subplate has connections spanning across the cortex (Hoerder-Suabedissen and Molnár,  
567 2012, 2015). It is known that subplate neurons generate spontaneous activity which  
568 mediates activity in the developing thalamus and cortex (Hanganu et al., 2001) and is  
569 vital for correct development of S1 (Tolner et al., 2012).

570 The amplitude of spontaneous activity was more variable than in evoked S1  
571 activations (Figure 6e). This could indicate that what is being observed is a  
572 heterogeneous population of spontaneous events that come from varied sources. This  
573 contrasts with sensory-evoked responses, which originate from a single source of  
574 consistent drive and so result in lower variability. While there are S1 only spontaneous  
575 events that are originate in the periphery (Figure 7), the majority of S1-M1 coactive  
576 events are driven internally from one or more of the above sources.

### 577 [Experience does not shape the early development of spontaneous functional](#) 578 [sensorimotor connectivity](#)

579 Given the sensitivity of ascending sensory pathways to experience in the early stages  
580 of life (Erzurumlu, 2010; Hensch, 2004), we might anticipate that development of  
581 downstream intra-cortical functional networks might also be affected by disruption of  
582 sensory input. However, chronic unilateral whisker trimming in the first postnatal week  
583 did not alter frequency of spontaneous activity and the coordination between regions of  
584 the sensorimotor cortex (Figure 8). The experience-independent emergence and  
585 development of spontaneous S1-M1 co-activity at these young ages does align with the  
586 fact that this form of activity is not driven from the sensory periphery (Figure 7). This  
587 suggests that the initial establishment of this sensorimotor cortical network may be  
588 innate. Our experiments do not rule out though that the integration of this network into  
589 sensory-driven responses is experience-dependent at some point in development. Indeed,

590 given that the activity-dependent maturation of each synaptic relay in sensory pathways  
591 occurs in sequence, with more peripheral connectivity developing earlier followed by  
592 thalamocortical and then local intra-cortical synapses, it may be that there is an  
593 experience-dependent phase later.

594 Overall, our findings suggest that there is an unexpectedly early establishment of  
595 functional connectivity between S1 and M1. There is preferential coordination of  
596 spontaneous activity in these regions from neonatal ages. At the same time, sensory  
597 stimulation can efficiently drive activity in S1 but is not yet able to engage this broader  
598 functional network even though it exists. Indeed, the spontaneous S1-M1 co-activity is  
599 largely not driven from the sensory periphery and develops independent of sensory  
600 experience, in contrast to the ascending pathways. This suggests that there is parallel,  
601 independent neonatal maturation of ascending sensory pathways and intra-cortical  
602 networks. We predict that the sensory-evoked activation of the full sensorimotor network  
603 emerges through maturation of a key, as yet unknown, synaptic pathway that links  
604 the ascending pathway to the already-established S1-M1 connectivity.

## 605 Methods

### 606 Animals

607 All procedures were carried out in accordance with UK Home Office guidelines set  
608 out in the Animals (Scientific Procedures) Act 1986.

609 Mice expressing GCaMP6f in excitatory cortical neurons were generated by crossing  
610 two transgenic lines: Emx1-IRES-cre (005628 - The Jackson Laboratory, USA) and loxP-  
611 GCaMP6f-loxP (Ai95D) (028865 - The Jackson Laboratory, USA). Experiments were  
612 performed on pups of both sexes from ages P1 to P9. In early stages of the project, using  
613 simple observation of new-born pups under fluorescence illumination, we noted seemingly  
614 off-target expression of the indicator across the entire body in a subset of animals. In  
615 contrast, other animals had expression that was restricted to the brain. We compared  
616 the distribution of expression in the brains of these two types of mice. Histological  
617 investigation of ‘whole body expression’ pups showed widespread GCaMP6 expression,  
618 including in sub-cortical regions of the brain (Supplementary Figure 1a – body). In  
619 contrast, in the “brain-only” animals, GCaMP6 expression was restricted to the  
620 neocortex as expected (Supplementary Figure 1a – brain only). Retrospective comparison  
621 of parental genotype linked “whole body expression” in some pups to double-transgenic  
622 sires. This suggested there may be germline recombination within some sperm of males  
623 carrying both Emx1-IRES-cre and Ai95D transgenes (Luo et al., 2020). In line with this,  
624 a breeding strategy using only singly transgenic males yielded no off-target “whole body”  
625 expression in pups. This strategy was adopted for all subsequent experiments.

### 626 Surgical procedure and anaesthesia

627 Surgical anaesthesia was induced with inhalation isoflurane (2-3%) in medical oxygen.  
628 Body temperature was maintained at 37°C during surgery and imaging, using a heatmap  
629 (Harvard Apparatus, UK). Local anaesthesia (20µl 2% xylocaine with adrenaline –  
630 AstraZeneca, UK) was administered subcutaneously under the scalp. The scalp was  
631 removed and clear dental cement (C&B super bond kit - Prestige Dental UK, Bradford,  
632 UK) was applied to the exposed skull and to attach a head-fixation bolt (4-40 ¼”  
633 stainless steel set screw - Thorlabs Inc. USA) attached over the cerebellar plate. Animals  
634 were maintained at 37°C and breathing air throughout recovery from anaesthesia and  
635 imaging protocols.

636 In line with previous studies, we found cortical activity in neonatal mice was almost  
637 completely suppressed during the administration of isoflurane anaesthesia (Ackman et

638 al., 2012; Adelsberger et al., 2005; Hanganu et al., 2006; Siegel et al., 2012). Spontaneous  
639 cortical activity started to appear a few minutes after cessation of isoflurane exposure  
640 (Supplementary Figure 1c-d). To further assess any lingering effects of anaesthesia, we  
641 measured the frequency of spontaneous events across the entire cortical field of view in  
642 3 minute epochs at 30, 60 and 90 minutes after removal of isoflurane. The frequency of  
643 spontaneous activity significantly increased between 30 minutes and 60 minutes post-  
644 anaesthesia, but there was no difference between 60 minutes and 90 minutes  
645 (Supplementary Figure 1c). These results suggest that although absolute suppression of  
646 spontaneous cortical activity by anaesthesia subsides within minutes, there may be a  
647 longer-term effect that takes up to an hour to resolve in younger animals. As such, all  
648 imaging data analysed was collected at least 60 minutes after removal of isoflurane.

#### 649 [Widefield calcium imaging protocol](#)

650 Awake animals were attached to an articulated ball and socket head mount. Imaging  
651 was performed on a tandem lens (50mm, 1.4f - Sigma Imaging, UK) fluorescence  
652 microscope, with a 470 nm blue LED excitation light (M470L3 – Thorlabs Inc. USA)  
653 and 500nm long pass emissions filter. Images were captured with CMOS camera (Q  
654 Imaging, Canada) as 12-bit 960x540 pixel TIFF files at 50Hz frame rate. Movement was  
655 recorded using a piezo bender (Piezo Systems Inc, USA) placed under the animals' body.  
656 Deviations in measurements from the pressure sensor correlated well with motion  
657 detected in video recordings of the limbs confirming they are a good indicator of gross  
658 body movements (Supplementary Figure 2ai). To isolate periods of movement, piezo  
659 voltage recordings were binarised using a thresholded envelope to define periods of  
660 movement and rest (Supplementary Figure 2a).

661 Images were collected in 10,000 frame epochs (3.3 minutes). Multiple stimulated and  
662 spontaneous recordings were collected for each animal, with a 30-minute interval  
663 between epochs of each type.

664 For single whisker stimulation individual whiskers were sequentially threaded into a  
665 glass capillary tube attached to a piezo bender (Q220-A4-103YB - Piezo Systems Inc,  
666 USA) to 1mm from the snout and a single deflection of 100ms and 150  $\mu$ m displacement  
667 was delivered every 10 seconds, with 20 repeats. For whisker array stimulation a custom  
668 15x8mm plastic paddle attached to a 9V servo motor (SG92R – Tower Pro) was used  
669 to displace the whole whisker field in a caudal to rostral direction for a 30ms  
670 displacement, at a 10 second interstimulus interval, for 20 repeats.

## 671 Sensory manipulations

672 For whisker trimming experiments all whiskers on the left side were removed daily  
673 from day of birth until experiments were carried out at P7. The procedure was performed  
674 on awake, scruffed animals using microdissection scissors (World Precision Instruments,  
675 USA) to cut the whisker down to the snout. For acute peripheral silencing 30 $\mu$ l of 2%  
676 xylocaine (AstraZeneca, UK) was injected subcutaneously into the right whisker pad.

## 677 Histology

678 Brains were removed from the skull and drop-fixed in 4% paraformaldehyde made in  
679 Dulbecco's PBS (Sigma-Aldrich Ltd, UK) for 48hrs at 4°C and then transferred to  
680 Dulbecco's PBS for storage. Brains were sectioned at 50 $\mu$ m from frontal to occipital pole  
681 using a vibratome (Leica VT1200 - Leica Microsystems, UK). Sections were mounted  
682 with Vectashield with DAPI medium (Vector Laboratories Ltd, UK) and visualised with  
683 a fluorescence microscope (DM IRB - Leica Microsystems, UK) and captured as tile  
684 scanned 696x52- 8 bit .lif images at 5x magnification.

## 685 Image analysis

686 Imagine data were analysed using custom designed software in MATLAB  
687 (Mathworks, MA, USA). Images were imported and underwent bilinear transformation  
688 to reduce the spatial resolution to 480x270 pixels.

689 Periods of movement were detected from the 1kHz piezo bender timeseries  
690 (Supplementary figure 3). A 20x averaging temporal filter was applied to match the  
691 frequency of calcium image capture. Matlab's 'envelope' function was used to delineate  
692 a continuous, positive time course of movement. A threshold was assigned manual for  
693 each trace and periods that exceeded this were assigned as movement. This binary  
694 movement log was used in imaging analysis to investigate periods of quiet rest.

695 Cortical regions of interest (ROIs) were manually delineated each animal. The area  
696 of activation evoked by whisker stimulation was used as a known anchor point for each  
697 animal (Figure 2d) and then both the Allen Institute's adult mouse atlas and the  
698 developing cortex atlas defined by (Ackman et al., 2014) were used to assign the location  
699 of other cortical regions. For spontaneous recordings average fluorescence timeseries for  
700 these regions were calculated and baseline corrected using the lowest 5% of values to  
701 produce  $\Delta f/f$  traces, that were then filtered with a 7Hz lowpass Butterworth filter to  
702 remove heartbeat-associated fluctuations (Supplementary Figure 1d). For spontaneous  
703 activity frequency events were detected using an automated peak detection algorithm

704 with a threshold of 1%  $\Delta f/f$  (twice the value of average noise) from local baseline, with  
705 events occurring during periods of movement discarded (Figure 2b&e). Correlations were  
706 calculated using Pearson's correlation between corrected timeseries (Figure 2c & f).

707 Seed pixel maps (SPMs) were generated using pairwise Pearson's correlation between  
708 baseline and temporally corrected timeseries of a single pixel in the barrel cortex and  
709 every other pixel in the cortex (Figure 3a). S1 and M1 areas of activation in these SPM  
710 were outlined and the average timeseries calculated. These were used, along with average  
711 visual cortex (V1) timeseries, to calculate the coincidence ratio. Events in all timeseries  
712 were detected with the automatic peak algorithm used previously. At each timepoint of  
713 an event in S1 occurring during rest a sliding lag window was applied to the other regions  
714 to determine if an event simultaneously had occurred, and the ratio of occurrence  
715 calculated (Figure 3c). For all events detected in S1 the image frames at the peak were  
716 manually assessed and categories by whether there was a change in  $\Delta f/f$  in M1  
717 accompanying S1 activity (Figure 4b).

718 Spatial activation was calculated by averaging the images of 1 second following  
719 deflection for all stimulations in which no movement was detected in this period. The  
720 average heatmap from an epoch of recording was used to calculate the ROI of activation  
721 was the area around the peak  $\Delta f/f$  that was 50% of the maximum (Figures 5a & 6a).  
722 This ROI was used to extract an average timeseries and was baseline corrected to the  
723 500ms of rest preceding each deflection. Amplitudes of events were calculated as the  
724 difference between the peak and the minimum of the preceding 500ms (Figure 6d).

## 725 [Non-negative matrix factorization \(NMF\)](#)

726 Image stacks were geometrically aligned to a custom 2D projection of the Allen  
727 Common Coordinate Framework v3 (CCF), within and across recordings, using nine  
728 anatomical landmarks: the left, centre, and right points where anterior cortex meets the  
729 olfactory bulbs; the sagittal sinus midline; bregma; and the centre of mass of the  
730 somatosensory and visual cortex from both hemispheres. After alignment and  
731 registration, non-neural pixels were masked using the outline of the atlas 2D projection,  
732 and recordings were spatially binned to 68x68 pixels (104  $\mu\text{m}^2/\text{pixel}$ ) and the  $\Delta F/F$  over  
733 time was computed individually per pixel. Since the factorization requires non-negative  
734 pixel values, the recording was normalized to a range of 0 to 1 using the maximum and  
735 minimum pixel values per recording. The data comprises 4 different developmental ages  
736 (P3, P5, P7 and P9), 6-7 animals per age, and 2 recordings per animal.

737 We used a standard non-negative matrix factorization (NMF) algorithm to discover  
738 spatial motifs in widefield data. The minimally pre-processed data,  $X$  ( $P$  pixels by  $T$   
739 points), is factorized into the  $\tilde{W}$  (spatial motif) and  $\tilde{H}$  (temporal weights of the motif)  
740 factors which minimize the following cost function to produce an optimal reconstruction  
741  $X \approx \tilde{X} = WH$ :

$$742 \quad (\tilde{W}, \tilde{H}) = \arg \min_{W, H} (\|X - WH\|_F^2); \text{ where } \|\cdot\|_F^2 \text{ is the Frobenius norm}$$

743 This problem is optimized using gradient descent with multiplicative updates  
744 (Mackevicius et al. 2019, eLife). Each optimization is run multiple rounds to assess the  
745 stability/consistency of each model. Ten independent NMF fits were run with different  
746 initial conditions for each motif number (from 1-30) and we choose the case that yields  
747 a factorization that explains on average  $\geq 75\%$  of the variance (EV) from the original  
748 dataset:

$$749 \quad EV = 1 - \frac{\|X - \bar{X}\|_F^2}{\|X - \bar{X}\|_F^2}; \quad \text{where } \bar{X} \text{ is the average of } X$$

750 The motifs obtained per NMF fit from the same recording were hierarchically  
751 clustered to obtain the set of spatial motifs per recording (Supplementary figure 2). For  
752 the clustering, motifs were renormalized to 0 to 1 and spatiotemporally smoothed with  
753 a 2D Gaussian filter ( $\sigma = [1, 1]$ ). The 2-D correlation coefficient between each pair of  
754 spatial motifs from the same recording was computed, and the distances between each  
755 pair of observations was used to create a hierarchical cluster tree. The maximum number  
756 of clusters was set to the number of NMF motifs originally found at 75% EV. Once the  
757 set of spatial motifs per recording was generated, the temporal weights of each motif was  
758 recalculated, fixing  $W$  to these set of spatial motifs.

759 To investigate whether these motifs could reflect underlying computations, we  
760 correlated (Pearson correlation) the temporal weightings of each motif in the set with  
761 the corresponding movement (piezo sensor) trace.

762 The presence of the S1-M1 co-activity motif within the set of spatial motifs per  
763 recording was visually assessed. Each data point represents the observation of a S1-M1  
764 co-activity motif, with the possibility of occurring more than once in the same recording.  
765 The contribution of the S1-M1 co-activity motif per recording was calculated as the  
766 average of the Relative Temporal Contribution (RTC) of the motif across the recording:

$$767 \quad RTC_{S1M1} = \frac{h^{k=S1M1} \sum_{p=1}^P w_p^{k=S1M1}}{\sum_{k=1}^K h^k \sum_{p=1}^P w_p^{k=S1M1}};$$

768 where  $K$  is the total number of motifs per recording,  $P$  is the total number of  
769 pixels,  $w^k$  and  $h^k$  are the spatial and temporal weight vectors for the  $k^{th}$  motif.

## 770 Statistical analysis

771 Statistical analysis was performed using R version 3.5.0 (The R Project). Data were  
772 checked for normality of distribution using both a Shapiro-Wilk's test and ANOVA or  
773 T-testing, or their non-parametric alternatives, were used where appropriate.

774



## 775 References

- 776 Ackman, J.B., Burbridge, T.J., and Crair, M.C. (2012). Retinal waves coordinate  
777 patterned activity throughout the developing visual system. *Nature* *490*, 219–225.
- 778 Ackman, J.B., Zeng, H., and Crair, M.C. (2014). Structured dynamics of neural  
779 activity across developing neocortex. *BioRxiv* 012237.
- 780 Adelsberger, H., Garaschuk, O., and Konnerth, A. (2005). Cortical calcium waves in  
781 resting newborn mice. *Nature Neuroscience* *8*, 988–990.
- 782 Afrashteh, N., Inayat, S., Contreras, E.B., Luczak, A., McNaughton, B.L., and  
783 Mohajerani, M.H. (2020). Spatiotemporal structure of sensory-evoked and spontaneous  
784 activity revealed by mesoscale imaging in anesthetized and awake mice. *BioRxiv*  
785 2020.05.22.111021.
- 786 Akhmetshina, D., Nasretdinov, A., Zakharov, A., Valeeva, G., and Khazipov, R.  
787 (2016). The Nature of the Sensory Input to the Neonatal Rat Barrel Cortex. *The Journal*  
788 *of Neuroscience: The Official Journal of the Society for Neuroscience* *36*, 9922–9932.
- 789 An, S., Kilb, W., and Luhmann, H.J. (2014). Sensory-Evoked and Spontaneous  
790 Gamma and Spindle Bursts in Neonatal Rat Motor Cortex. *Journal of Neuroscience* *34*,  
791 10870–10883.
- 792 Anastasiades, P.G., and Butt, S.J.B. (2012). A role for silent synapses in the  
793 development of the pathway from layer 2/3 to 5 pyramidal cells in the neocortex. *Journal*  
794 *of Neuroscience* *32*, 13085–13099.
- 795 Antón-Bolaños, N., Sempere-Ferràndez, A., Guillamón-Vivancos, T., Martini, F.J.,  
796 Pérez-Saiz, L., Gezelius, H., Filipchuk, A., Valdeolillos, M., and López-Bendito, G.  
797 (2019). Prenatal activity from thalamic neurons governs the emergence of functional  
798 cortical maps in mice. *Science* eaav7617.
- 799 Arakawa, H., and Erzurumlu, R.S. (2015). Role of whiskers in sensorimotor  
800 development of C57BL/6 mice. *Behavioural Brain Research* *287*, 146–155.
- 801 Aronoff, R., Matyas, F., Mateo, C., Ciron, C., Schneider, B., and Petersen, C.C.H.  
802 (2010). Long-range connectivity of mouse primary somatosensory barrel cortex. *The*  
803 *European Journal of Neuroscience* *31*, 2221–2233.
- 804 Arroyo, D.A., and Feller, M.B. (2016). Spatiotemporal Features of Retinal Waves  
805 Instruct the Wiring of the Visual Circuitry. *Frontiers in Neural Circuits* *10*, 54.

- 806 Ashby, M.C., and Isaac, J.T.R. (2011). Maturation of a recurrent excitatory  
807 neocortical circuit by experience-dependent unsilencing of newly formed dendritic spines.  
808 *Neuron* *70*, 510–521.
- 809 Babola, T.A., Li, S., Gribizis, A., Lee, B.J., Issa, J.B., Wang, H.C., Crair, M.C., and  
810 Bergles, D.E. (2018). Homeostatic Control of Spontaneous Activity in the Developing  
811 Auditory System. *Neuron* *99*, 511-524.e5.
- 812 Blankenship, A.G., and Feller, M.B. (2010). Mechanisms underlying spontaneous  
813 patterned activity in developing neural circuits. *Nature Reviews. Neuroscience* *11*, 18–  
814 29.
- 815 van der Bourg, A., Yang, J.-W., Reyes-Puerta, V., Laurenczy, B., Wieckhorst, M.,  
816 Stüttgen, M.C., Luhmann, H.J., and Helmchen, F. (2016). Layer-Specific Refinement of  
817 Sensory Coding in Developing Mouse Barrel Cortex. *Cerebral Cortex* *27*, 4835–4850.
- 818 Buzsáki, G. (2010). Neural syntax: cell assemblies, synapsembles, and readers. *Neuron*  
819 *68*, 362–385.
- 820 Chakrabarti, S., and Alloway, K.D. (2006). Differential origin of projections from SI  
821 barrel cortex to the whisker representations in SII and MI. *The Journal of Comparative*  
822 *Neurology* *498*, 624–636.
- 823 Chakrabarti, S., Zhang, M., and Alloway, K.D. (2008). MI Neuronal Responses to  
824 Peripheral Whisker Stimulation: Relationship to Neuronal Activity in SI Barrels and  
825 Septa. *Journal of Neurophysiology* *100*, 50–63.
- 826 Chakrabarty, S., and Martin, J.H. (2000). Postnatal Development of the Motor  
827 Representation in Primary Motor Cortex. *Journal of Neurophysiology* *84*, 2582–2594.
- 828 Chan, A.W., Mohajerani, M.H., LeDue, J.M., Wang, Y.T., and Murphy, T.H. (2015).  
829 Mesoscale infraslow spontaneous membrane potential fluctuations recapitulate high-  
830 frequency activity cortical motifs. *Nature Communications* *6*, 1–12.
- 831 Chan, C.-H., Godinho, L.N., Thomaidou, D., Tan, S.-S., Gulisano, M., and  
832 Parnavelas, J.G. (2001). Emx1 is a Marker for Pyramidal Neurons of the Cerebral  
833 Cortex. *Cerebral Cortex* *11*, 1191–1198.
- 834 Chen, T.-W., Wardill, T.J., Sun, Y., Pulver, S.R., Renninger, S.L., Baohan, A.,  
835 Schreiter, E.R., Kerr, R.A., Orger, M.B., Jayaraman, V., et al. (2013). Ultrasensitive  
836 fluorescent proteins for imaging neuronal activity. *Nature* *499*, 295–300.

- 837 Colonnese, M., and Khazipov, R. (2012). Spontaneous activity in developing sensory  
838 circuits: Implications for resting state fMRI. *NeuroImage* *62*, 2212–2221.
- 839 Colonnese, M.T., and Khazipov, R. (2010). “Slow activity transients” in  
840 infant rat visual cortex: a spreading synchronous oscillation patterned by retinal waves.  
841 *The Journal of Neuroscience: The Official Journal of the Society for Neuroscience* *30*,  
842 4325–4337.
- 843 Crair, M., and Malenka, R. (1995). A critical period for long-term potentiation at  
844 thalamocortical synapses. *Nature*.
- 845 Daw, N.W., Fox, K., Sato, H., and Czepita, D. (1992). Critical period for monocular  
846 deprivation in the cat visual cortex. *Journal of Neurophysiology* *67*, 197–202.
- 847 Dooley, J.C., and Blumberg, M.S. (2018). Developmental “awakening” of primary  
848 motor cortex to the sensory consequences of movement. *ELife* *7*.
- 849 Dooley, J.C., and Krubitzer, L.A. (2019). Alterations in cortical and thalamic  
850 connections of somatosensory cortex following early loss of vision. *Journal of*  
851 *Comparative Neurology* *527*, 1675–1688.
- 852 Doria, V., Beckmann, C.F., Arichi, T., Merchant, N., Groppo, M., Turkheimer, F.E.,  
853 Counsell, S.J., Murgasova, M., Aljabar, P., Nunes, R.G., et al. (2010). Emergence of  
854 resting state networks in the preterm human brain. *Proceedings of the National Academy*  
855 *of Sciences of the United States of America* *107*, 20015–20020.
- 856 Erzurumlu, R.S. (2010). Critical period for the whisker-barrel system. *Experimental*  
857 *Neurology* *222*, 10–12.
- 858 Erzurumlu, R.S., and Gaspar, P. (2012). Development and critical period plasticity  
859 of the barrel cortex. *The European Journal of Neuroscience* *35*, 1540–1553.
- 860 Feldman, D.E. (2009). Synaptic mechanisms for plasticity in neocortex. *Annual*  
861 *Review of Neuroscience* *32*, 33–55.
- 862 Feldman, D.E., and Brecht, M. (2005). Map plasticity in somatosensory cortex.  
863 *Science (New York, N.Y.)* *310*, 810–815.
- 864 Ferezou, I., Haiss, F., Gentet, L.J., Aronoff, R., Weber, B., and Petersen, C.C.H.  
865 (2007). Spatiotemporal Dynamics of Cortical Sensorimotor Integration in Behaving  
866 Mice. *Neuron* *56*, 907–923.

- 867 Fox, K. (1992). A critical period for experience-dependent synaptic plasticity in rat  
868 barrel cortex. *The Journal of Neuroscience: The Official Journal of the Society for*  
869 *Neuroscience* *12*, 1826–1838.
- 870 Fox, K., and Wong, R.O.L. (2005). A Comparison of Experience-Dependent Plasticity  
871 in the Visual and Somatosensory Systems. *Neuron* *48*, 465–477.
- 872 Glazewski, S., Benedetti, B.L., and Barth, A.L. (2007). Ipsilateral whiskers suppress  
873 experience-dependent plasticity in the barrel cortex. *Journal of Neuroscience* *27*, 3910–  
874 3920.
- 875 Gómez, L.J., Dooley, J.C., Sokoloff, G., and Blumberg, M.S. (2021). Parallel and  
876 Serial Sensory Processing in Developing Primary Somatosensory and Motor Cortex. *The*  
877 *Journal of Neuroscience* *41*, 3418–3431.
- 878 Hanganu, I.L., Kilb, W., and Luhmann, H.J. (2001). Spontaneous synaptic activity  
879 of subplate neurons in neonatal rat somatosensory cortex. *Cerebral Cortex (New York,*  
880 *N.Y. : 1991)* *11*, 400–410.
- 881 Hanganu, I.L., Ben-Ari, Y., and Khazipov, R. (2006). Retinal waves trigger spindle  
882 bursts in the neonatal rat visual cortex. *The Journal of Neuroscience: The Official*  
883 *Journal of the Society for Neuroscience* *26*, 6728–6736.
- 884 Harris, K.D. (2005). Neural signatures of cell assembly organization. *Nature Reviews*  
885 *Neuroscience* *6*, 399–407.
- 886 Hensch, T.K. (2004). Critical period regulation. *Annual Review of Neuroscience* *27*,  
887 549–579.
- 888 Henschke, J.U., Noesselt, T., Scheich, H., and Budinger, E. (2015). Possible  
889 anatomical pathways for short-latency multisensory integration processes in primary  
890 sensory cortices. *Brain Structure and Function* *220*, 955–977.
- 891 Henschke, J.U., Oelschlegel, A.M., Angenstein, F., Ohl, F.W., Goldschmidt, J.,  
892 Kanold, P.O., and Budinger, E. (2017). Early sensory experience influences the  
893 development of multisensory thalamocortical and intracortical connections of primary  
894 sensory cortices. *Brain Structure and Function* *223*, 1165–1190.
- 895 Henschke, J.U., Ohl, F.W., and Budinger, E. (2018). Crossmodal Connections of  
896 Primary Sensory Cortices Largely Vanish During Normal Aging. *Frontiers in Aging*  
897 *Neuroscience* *10*, 52.

- 898 van den Heuvel, M.P., and Hulshoff Pol, H.E. (2010). Exploring the brain network:  
899 A review on resting-state fMRI functional connectivity. *European*  
900 *Neuropsychopharmacology* *20*, 519–534.
- 901 Hoerder-Suabedissen, A., and Molnár, Z. (2012). Morphology of mouse subplate cells  
902 with identified projection targets changes with age. *The Journal of Comparative*  
903 *Neurology* *520*, 174–185.
- 904 Hoerder-Suabedissen, A., and Molnár, Z. (2015). Development, evolution and  
905 pathology of neocortical subplate neurons. *Nature Reviews Neuroscience* *16*, 133–146.
- 906 Hooks, B.M., Hires, S.A., Zhang, Y.-X., Huber, D., Petreanu, L., Svoboda, K., and  
907 Shepherd, G.M.G. (2011). Laminar analysis of excitatory local circuits in vibrissal motor  
908 and sensory cortical areas. *PLoS Biology* *9*, e1000572.
- 909 Katz, L.C., and Shatz, C.J. (1996). Synaptic activity and the construction of cortical  
910 circuits. *Science* *274*, 1133–1138.
- 911 Keller, A., and Carlson, G.C. (1999). Neonatal whisker clipping alters intracortical,  
912 but not thalamocortical projections, in rat barrel cortex. *The Journal of Comparative*  
913 *Neurology* *412*, 83–94.
- 914 Khazipov, R., Sirota, A., Leinekugel, X., Holmes, G.L., Ben-Ari, Y., and Buzsáki, G.  
915 (2004). Early motor activity drives spindle bursts in the developing somatosensory  
916 cortex. *Nature* *432*, 758–761.
- 917 Kirkby, L.A., Sack, G.S., Firl, A., and Feller, M.B. (2013). A Role for Correlated  
918 Spontaneous Activity in the Assembly of Neural Circuits. *Neuron* *80*, 1129–1144.
- 919 Kozberg, M.G., Ma, Y., Shaik, M.A., Kim, S.H., and Hillman, E.M.C. (2016). Rapid  
920 Postnatal Expansion of Neural Networks Occurs in an Environment of Altered  
921 Neurovascular and Neurometabolic Coupling. *The Journal of Neuroscience : The Official*  
922 *Journal of the Society for Neuroscience* *36*, 6704–6717.
- 923 Kummer, M., Kirmse, K., Witte, O.W., and Holthoff, K. (2012). Reliable in vivo  
924 identification of both GABAergic and glutamatergic neurons using Emx1-Cre driven  
925 fluorescent reporter expression. *Cell Calcium* *52*, 182–189.
- 926 Kuroki, S., Yoshida, T., Tsutsui, H., Iwama, M., Ando, R., Michikawa, T., Miyawaki,  
927 A., Ohshima, T., and Itoharu, S. (2018). Excitatory Neuronal Hubs Configure  
928 Multisensory Integration of Slow Waves in Association Cortex. *Cell Reports* *22*, 2873–  
929 2885.

- 930 Leighton, A.H., and Lohmann, C. (2016). The Wiring of Developing Sensory Circuits-  
931 From Patterned Spontaneous Activity to Synaptic Plasticity Mechanisms. *Frontiers in*  
932 *Neural Circuits* *10*, 71.
- 933 López-Bendito, G., and Molnár, Z. (2003). Thalamocortical development: how are we  
934 going to get there? *Nature Reviews Neuroscience* *4*, 276–289.
- 935 Lu, H.C., Gonzalez, E., and Crair, M.C. (2001). Barrel cortex critical period plasticity  
936 is independent of changes in NMDA receptor subunit composition. *Neuron* *32*, 619–634.
- 937 Luo, L., Ambrozkiwicz, M.C., Benseler, F., Chen, C., Dumontier, E., Falkner, S.,  
938 Furlanis, E., Gomez, A.M., Hoshina, N., Huang, W.H., et al. (2020). Optimizing Nervous  
939 System-Specific Gene Targeting with Cre Driver Lines: Prevalence of Germline  
940 Recombination and Influencing Factors. *Neuron* *106*.
- 941 Mackevicius, E.L., Bahle, A.H., Williams, A.H., Gu, S., Denisenko, N.I., Goldman,  
942 M.S., and Fee, M.S. (2019). Unsupervised discovery of temporal sequences in high-  
943 dimensional datasets, with applications to neuroscience. *ELife* *8*.
- 944 Manita, S., Suzuki, T., Homma, C., Matsumoto, T., Odagawa, M., Yamada, K., Ota,  
945 K., Matsubara, C., Inutsuka, A., Sato, M., et al. (2015). A Top-Down Cortical Circuit  
946 for Accurate Sensory Perception. *Neuron* *86*, 1304–1316.
- 947 Mao, T., Kusefoglou, D., Hooks, B.M., Huber, D., Petreanu, L., and Svoboda, K.  
948 (2011). Long-Range Neuronal Circuits Underlying the Interaction between Sensory and  
949 Motor Cortex. *Neuron* *72*, 111–123.
- 950 Mayrhofer, J.M., El-Boustani, S., Foustoukos, G., Auffret, M., Tamura, K., and  
951 Petersen, C.C.H. (2019). Distinct Contributions of Whisker Sensory Cortex and Tongue-  
952 Jaw Motor Cortex in a Goal-Directed Sensorimotor Transformation. *Neuron* 1–10.
- 953 McVea, D.A., Murphy, T.H., and Mohajerani, M.H. (2017). Spontaneous activity  
954 synchronizes whisker-related sensorimotor networks prior to their maturation in the  
955 developing rat cortex. *BioRxiv* 176800.
- 956 Mitrukhina, O., Suchkov, D., Khazipov, R., and Minlebaev, M. (2014). Imprecise  
957 Whisker Map in the Neonatal Rat Barrel Cortex.
- 958 Mizuno, H., Ikezoe, K., Nakazawa, S., Sato, T., Kitamura, K., and Iwasato, T. (2018).  
959 Patchwork-Type Spontaneous Activity in Neonatal Barrel Cortex Layer 4 Transmitted  
960 via Thalamocortical Projections. *Cell Reports* *22*, 123–135.

- 961 Mohajerani, M.H., McVea, D.A., Fingas, M., and Murphy, T.H. (2010). Mirrored  
962 bilateral slow-wave cortical activity within local circuits revealed by fast bihemispheric  
963 voltage-sensitive dye imaging in anesthetized and awake mice. *The Journal of*  
964 *Neuroscience : The Official Journal of the Society for Neuroscience* *30*, 3745–3751.
- 965 Mohajerani, M.H., Chan, A.W., Mohsenvand, M., LeDue, J., Liu, R., McVea, D.A.,  
966 Boyd, J.D., Wang, Y.T., Reimers, M., and Murphy, T.H. (2013). Spontaneous cortical  
967 activity alternates between motifs defined by regional axonal projections. *Nature*  
968 *Neuroscience* *16*, 1426–1435.
- 969 Moreno-Juan, V., Filipchuk, A., Antón-Bolaños, N., Mezzera, C., Gezelius, H.,  
970 Andrés, B., Rodríguez-Malmierca, L., Susín, R., Schaad, O., Iwasato, T., et al. (2017).  
971 Prenatal thalamic waves regulate cortical area size prior to sensory processing. *Nature*  
972 *Communications* *8*, 14172.
- 973 Musall, S., Kaufman, M.T., Juavinett, A.L., Gluf, S., and Churchland, A.K. (2019).  
974 Single-trial neural dynamics are dominated by richly varied movements. *Nature*  
975 *Neuroscience* *22*, 1677–1686.
- 976 Nakazawa, S., Yoshimura, Y., Takagi, M., Mizuno, H., and Iwasato, T. (2020).  
977 Developmental Phase Transitions in Spatial Organization of Spontaneous Activity in  
978 Postnatal Barrel Cortex Layer 4. *BioRxiv* 2020.05.26.117713.
- 979 Petersen, C.C.H. (2019). Sensorimotor processing in the rodent barrel cortex. *Nature*  
980 *Reviews Neuroscience* 1–14.
- 981 Quairiaux, C., Megevand, P., Kiss, J.Z., and Michel, C.M. (2011). Functional  
982 Development of Large-Scale Sensorimotor Cortical Networks in the Brain. *Journal of*  
983 *Neuroscience* *31*, 9574–9584.
- 984 Ratzlaff, E.H., and Grinvald, A. (1991). A tandem-lens epifluorescence microscope:  
985 Hundred-fold brightness advantage for wide-field imaging. *Journal of Neuroscience*  
986 *Methods* *36*, 127–137.
- 987 Siegel, F., Heimel, J.A., Peters, J., and Lohmann, C. (2012). Peripheral and central  
988 inputs shape network dynamics in the developing visual cortex in vivo. *Current Biology :*  
989 *CB* *22*, 253–258.
- 990 Stern, E. a, Maravall, M., and Svoboda, K. (2001). Rapid development and plasticity  
991 of layer 2/3 maps in rat barrel cortex in vivo. *Neuron* *31*, 305–315.

- 992 Tiriac, A., Uitermarkt, B.D., Fanning, A.S., Sokoloff, G., and Blumberg, M.S. (2012).  
993 Rapid Whisker Movements in Sleeping Newborn Rats. *Current Biology* *22*, 2075–2080.
- 994 Tiriac, A., Del Rio-Bermudez, C., and Blumberg, M.S. (2014). Self-Generated  
995 Movements with “Unexpected” Sensory Consequences. *Current Biology* *24*, 2136–2141.
- 996 Tolner, E.A., Sheikh, A., Yukin, A.Y., Kaila, K., and Kanold, P.O. (2012). Subplate  
997 neurons promote spindle bursts and thalamocortical patterning in the neonatal rat  
998 somatosensory cortex. *The Journal of Neuroscience : The Official Journal of the Society*  
999 *for Neuroscience* *32*, 692–702.
- 1000 Tolonen, M., Palva, J.M., Andersson, S., and Vanhatalo, S. (2007). Development of  
1001 the spontaneous activity transients and ongoing cortical activity in human preterm  
1002 babies. *Neuroscience* *145*, 997–1006.
- 1003 Torborg, C.L., and Feller, M.B. (2005). Spontaneous patterned retinal activity and  
1004 the refinement of retinal projections. *Progress in Neurobiology* *76*, 213–235.
- 1005 Vagnoni, C., Baruchin, L.J., Ghezzi, F., Ratti, S., Molnar, Z., and Butt, S. (2020).  
1006 Ontogeny of the VIP+ interneuron sensory-motor circuit prior to active whisking.  
1007 *BioRxiv* 2020.07.01.182238.
- 1008 Vanhatalo, S., and Kaila, K. (2006). Development of neonatal EEG activity: From  
1009 phenomenology to physiology. *Seminars in Fetal and Neonatal Medicine* *11*, 471–478.
- 1010 Vanni, M.P., and Murphy, T.H. (2014). Mesoscale Transcranial Spontaneous Activity  
1011 Mapping in GCaMP3 Transgenic Mice Reveals Extensive Reciprocal Connections  
1012 between Areas of Somatomotor Cortex. *Journal of Neuroscience* *34*, 15931–15946.
- 1013 Viaene, A.N., Petrof, I., and Sherman, S.M. (2011). Synaptic properties of thalamic  
1014 input to layers 2/3 and 4 of primary somatosensory and auditory cortices. *Journal of*  
1015 *Neurophysiology* *105*, 279–292.
- 1016 Wang, H.C., Lin, C.-C., Cheung, R., Zhang-Hooks, Y., Agarwal, A., Ellis-Davies, G.,  
1017 Rock, J., and Bergles, D.E. (2015). Spontaneous Activity of Cochlear Hair Cells  
1018 Triggered by Fluid Secretion Mechanism in Adjacent Support Cells. *Cell* *163*, 1348–1359.
- 1019 Weller, W.L., and Johnson, J.I. (1975). Barrels in cerebral cortex altered by receptor  
1020 disruption in newborn, but not in five-day-old mice (Cricetidae and Muridae). *Brain*  
1021 *Research* *83*, 504–508.



1022 West, S.L., Aronson, J., Popa, L.S., Carter, R.E., Shekhar, A., Feller, K.D., Ghanbari,  
1023 L., Kodandaramaiah, S.B., and Ebner, T.J. (2020). Wide-Field Calcium Imaging of  
1024 Dynamic Cortical Networks During Locomotion. *BioRxiv* 2020.07.06.189670.

1025 White, B.R., Bauer, A.Q., Snyder, A.Z., Schlaggar, B.L., Lee, J.-M., and Culver, J.P.  
1026 (2011). Imaging of Functional Connectivity in the Mouse Brain. *PLoS ONE* *6*, e16322.

1027 Wright, P.W., Brier, L.M., Bauer, A.Q., Baxter, G.A., Kraft, A.W., Reisman, M.D.,  
1028 Bice, A.R., Snyder, A.Z., Lee, J.-M., and Culver, J.P. (2017). Functional connectivity  
1029 structure of cortical calcium dynamics in anesthetized and awake mice. *PloS One* *12*,  
1030 e0185759.

1031 Yamamoto, N., and López-Bendito, G. (2012). Shaping brain connections through  
1032 spontaneous neural activity. *European Journal of Neuroscience* *35*, 1595–1604.

1033 Yang, An, S., Sun, J.-J., Reyes-Puerta, V., Kindler, J., Berger, T., Kilb, W., and  
1034 Luhmann, H.J. (2013). Thalamic Network Oscillations Synchronize Ontogenetic  
1035 Columns in the Newborn Rat Barrel Cortex. *Cerebral Cortex* *23*, 1299–1316.

1036 Yang, J.-W., Hanganu-Opatz, I.L., Sun, J.-J., and Luhmann, H.J. (2009). Three  
1037 patterns of oscillatory activity differentially synchronize developing neocortical networks  
1038 in vivo. *The Journal of Neuroscience: The Official Journal of the Society for*  
1039 *Neuroscience* *29*, 9011–9025.

1040 Yang, J.W., Kilb, W., Kirischuk, S., Unichenko, P., Stüttgen, M.C., and Luhmann,  
1041 H.J. (2018). Development of the whisker-to-barrel cortex system. *Current Opinion in*  
1042 *Neurobiology* *53*, 29–34.

1043 Young, N.A., Vuong, J., and Teskey, G.C. (2012). Development of motor maps in  
1044 rats and their modulation by experience. *Journal of Neurophysiology* *108*, 1309–1317.

1045

1046

## 1047 Author Contributions

1048 CMC designed and performed experiments, analysed data and contributed to the  
1049 manuscript writing. LMS designed and implemented data analysis and contributed to  
1050 writing the manuscript. NW supervised data analysis and contributed to the manuscript.  
1051 KL supervised CMC and contributed to project design. MCA designed and supervised  
1052 the project, built imaging hardware, performed data analysis and contributed to  
1053 manuscript writing.

## 1054 Declaration of interests

1055 The authors declare no competing interests.

## 1056 Acknowledgments

1057 This research was funded in whole, or in part, by the Wellcome Trust (Grant number  
1058 220102/Z/20/Z), Medical Research Council (Grant number 1514380) and EUFP17  
1059 Marie Curie Actions (Grant number PCIG10-GA-2011-303680). NW is supported by a  
1060 Turing Fellowship from the Alan Turing Institute.

1061
